# Supplementary material for: Distributed natural gas venting offshore along the Cascadia margin
Source: Nat Commun. 2018 Aug 15;9:3264. doi: 10.1038/s41467-018-05736-x (PMC6093902; doi:10.1038/s41467-018-05736-x)
Supplement: Supplementary file 4 — Supplementary Data 2 [file 41467_2018_5736_MOESM4_ESM.xlsx]

## Sheet: Tabelle1
Supplementary Data 2: List of all identified gas vents across the study region of Cascadia. Included are also vent-locations based on previous publications, AUV- and ROV-observations. For abbreviations used for cruises, please see Supplementary Data 1. References are given by number as listed below data table. [n.a.: not available]
ID	Longitude	Latitude	Depth	Cruise ID / Reference	Acoustic System	Horizontal uncertainty in position	Date of detection	Time of detection
	(°W)	(°N)	(m)			(m)	(mm/dd/yyyy)	(hh:mm:ss)
1	-124.678	42.5527	150.1	MF0509	EK60	14.6	2005-07-07	20:05:52
2	-124.651	42.6227	141.8	SH1305	EK60	13.8	2013-07-17	02:03:05
3	-124.903	42.6513	789.5	SH1305	EK60	76.7	2013-06-07	06:42:34
4	-124.951	42.7397	999.3	MF0509	EK60	97.1	2005-07-07	23:57:17
5	-124.946	42.784	818.1	SH1507	EK60	79.5	2015-07-22	23:25:20
6	-124.699	42.7864	140.8	SH1103	EK60	13.7	2011-07-10	16:26:39
7	-124.698	42.8151	126.7	SH1103	EK60	12.3	2011-07-10	16:35:43
8	-124.952	43.024	898.5	AT26-16	EM122	31.4	2014-07-07	20:14:14
9	-124.952	43.0252	900.6	AT26-01	EM122	31.5	2013-06-16	19:43:32
10	-124.67	43.0333	142.6	1, 2	n.a.
11	-124.686	43.0397	154.7	SH1103	EK60	15	2011-07-20	03:18:50
12	-124.683	43.0398	150.8	SH1103	EK60	14.7	2011-07-20	03:19:37
13	-124.686	43.0416	154.7	MF0903	EK60	15	2009-07-22	13:54:31
14	-124.695	43.043	156.9	SH1103	EK60	15.2	2011-07-20	06:55:04
15	-124.698	43.0482	157.3	MF0903	EK60	15.3	2009-07-22	13:47:51
16	-124.694	43.0482	156.7	MF0903	EK60	15.2	2009-07-22	13:47:11
17	-124.925	43.1049	665.4	AT26-01	EM122	23.3	2013-06-16	20:05:40
18	-124.927	43.1052	690.8	AT26-01	EM122	24.2	2013-06-16	20:05:50
19	-124.65	43.1172	138.1	SH1507	EK60	13.4	2015-07-23	03:57:41
20	-124.649	43.1172	138.1	SH1507	EK60	13.4	2015-07-23	03:57:25
21	-124.663	43.1217	139.1	SH1103	EK60	13.5	2011-07-15	04:19:31
22	-124.662	43.1249	140.5	SH1103	EK60	13.7	2011-07-15	04:18:37
23	-124.918	43.177	643.3	AT26-16	EM122	22.5	2014-07-07	21:14:02
24	-124.803	43.171	312.2	EX1503L2	EM302	10.9	2015-06-07	04:26:33
25	-124.804	43.1724	312.2	EX1503L2	EM302	10.9	2015-06-07	04:27:07
26	-124.804	43.1724	312.2	EX1503L2	EM302	10.9	2015-06-07	04:27:07
27	-124.894	43.2833	503.2	AT26-16	EM122	17.6	2014-07-07	21:51:40
28	-125.049	43.5724	1055.7	MF0509	EK60	102.6	2005-07-12	18:52:12
29	-124.808	43.5832	483.6	AT26-16	EM122	16.9	2014-07-07	23:32:00
30	-124.804	43.6093	743.4	AT26-01	EM122	26	2013-06-16	22:25:02
31	-124.823	43.6094	603.8	EX1503L2	EM302	21.1	2015-06-07	07:23:29
32	-124.723	43.6763	530	SH1305	EK60	51.5	2013-06-07	01:40:23
33	-124.722	43.6785	530	SH1305	EK60	51.5	2013-06-07	01:39:39
34	-124.476	43.6995	132.2	SH1204	EK60	12.8	2012-06-26	05:53:00
35	-124.475	43.7003	132.2	SH1204	EK60	12.8	2012-06-26	05:52:46
36	-124.475	43.7008	132.2	SH1204	EK60	12.8	2012-06-26	05:52:39
37	-124.759	43.7242	559.4	AT26-02	EM122	19.6	2013-06-28	17:47:10
38	-124.919	43.876	498.5	1, 3	n.a.
39	-124.191	44.001	50.2	SH1204	EK60	4.9	2012-07-25	00:52:47
40	-124.87	44.0033	86.8	1, 2	n.a.
41	-124.692	44.0038	117.4	SH1405	EK60	11.4	2014-09-10	14:23:36
42	-124.936	44.007	220.3	1, 3	n.a.
43	-124.717	44.0104	99.7	AT26-16	EM122	3.5	2014-07-08	01:41:05
44	-124.193	44.0119	51.1	SH1204	EK60	5	2012-07-25	00:56:32
45	-124.193	44.0138	51.1	SH1204	EK60	5	2012-07-25	00:57:12
46	-124.977	44.0267	656	AT26-02	EM122	23	2013-06-28	06:10:06
47	-124.714	44.027	121.5	AT26-16	EM122	5	2014-07-08	01:46:19
48	-124.908	44.029	149.6	SH1405	EK60	14.5	2014-09-01	22:41:29
49	-124.908	44.0292	149.6	SH1405	EK60	14.5	2014-09-01	22:41:23
50	-124.922	44.0516	159	SH1405	EK60	15.5	2014-09-11	16:04:27
51	-124.92	44.0517	159	SH1405	EK60	15.5	2014-09-01	20:17:37
52	-124.92	44.0518	159	SH1405	EK60	15.5	2014-09-11	15:32:14
53	-124.928	44.0539	186	SH1405	EK60	18.1	2014-09-01	22:29:26
54	-124.928	44.0541	186	SH1405	EK60	18.1	2014-09-01	22:29:18
55	-124.968	44.0553	547.9	MF0903	EK60	53.3	2009-07-24	22:58:27
56	-124.913	44.058	150.9	SH1405	EK60	14.7	2014-08-31	03:07:56
57	-124.915	44.058	155	SH1405	EK60	15.1	2014-08-31	03:08:18
58	-124.913	44.0581	150.9	SH1405	EK60	14.7	2014-09-01	08:30:56
59	-124.915	44.0581	155	SH1405	EK60	15.1	2014-09-01	08:31:17
60	-124.913	44.0581	150.9	SH1405	EK60	14.7	2014-09-02	07:38:56
61	-124.913	44.0582	150.9	SH1405	EK60	14.7	2014-09-08	12:39:39
62	-124.915	44.0582	155	SH1405	EK60	15.1	2014-08-31	07:14:28
63	-124.913	44.0582	150.9	SH1405	EK60	14.7	2014-08-31	07:14:07
64	-124.915	44.0583	155	SH1405	EK60	15.1	2014-09-08	12:40:00
65	-124.932	44.0587	270.7	SH1405	EK60	26.3	2014-09-08	12:44:18
66	-124.943	44.112	225.1	1, 3	n.a.
67	-124.902	44.1886	130.7	SH1507	EK60	12.7	2015-08-06	17:40:52
68	-124.901	44.1895	127.7	SH1507	EK60	12.4	2015-08-06	17:41:21
69	-124.969	44.192	274.9	1, 3	n.a.
70	-124.832	44.1928	90.3	SH1405	EK60	8.8	2014-09-11	20:20:39
71	-124.833	44.1929	90.3	SH1405	EK60	8.8	2014-09-11	20:19:56
72	-124.851	44.2027	113.9	EX1503L2	EM302	4	2015-06-07	11:19:38
73	-124.852	44.2033	113.9	EX1503L2	EM302	4	2015-06-07	11:19:53
74	-124.852	44.2033	113.9	EX1503L2	EM302	4	2015-06-07	11:19:53
75	-124.851	44.2033	113.9	EX1503L2	EM302	4	2015-06-07	11:19:53
76	-124.851	44.2034	118.2	EX1503L2	EM302	4.1	2015-06-07	11:19:54
77	-124.851	44.2034	118.2	EX1503L2	EM302	4.1	2015-06-07	11:19:54
78	-124.852	44.2035	118.2	EX1503L2	EM302	4.1	2015-06-07	11:19:58
79	-124.851	44.2035	118.2	EX1503L2	EM302	4.1	2015-06-07	11:19:58
80	-124.851	44.2037	118.2	EX1503L2	EM302	4.1	2015-06-07	11:20:02
81	-124.851	44.2037	118.2	EX1503L2	EM302	4.1	2015-06-07	11:20:02
82	-124.851	44.2037	118.2	EX1503L2	EM302	4.1	2015-06-07	11:20:02
83	-124.85	44.2038	118.2	EX1503L2	EM302	4.1	2015-06-07	11:20:02
84	-124.851	44.204	118.2	EX1503L2	EM302	4.1	2015-06-07	11:20:07
85	-124.851	44.204	118.2	EX1503L2	EM302	4.1	2015-06-07	11:20:07
86	-124.851	44.204	118.2	EX1503L2	EM302	4.1	2015-06-07	11:20:07
87	-124.851	44.204	118.2	EX1503L2	EM302	4.1	2015-06-07	11:20:07
88	-124.854	44.2063	118.9	SH1103	EK60	11.6	2011-07-22	18:59:10
89	-124.854	44.2063	118.9	SH1103	EK60	11.6	2011-07-22	18:59:20
90	-124.855	44.208	117.5	SH1507	EK60	11.4	2015-08-06	17:54:38
91	-124.853	44.2084	117.5	SH1507	EK60	11.4	2015-08-06	17:54:54
92	-125	44.217	477	1, 3	n.a.
93	-124.997	44.2223	500	AT26-02	EM122	17.5	2013-06-28	04:34:30
94	-124.997	44.2225	501.6	AT26-02	EM122	17.6	2013-06-28	04:34:24
95	-125.045	44.2549	871.2	AT26-02	EM122	30.5	2013-06-28	04:05:32
96	-125.068	44.259	904.1	AT26-02	EM122	31.6	2013-06-28	03:53:57
97	-124.661	44.2706	83.6	AT26-16	EM122	2.9	2014-07-08	03:01:00
98	-124.902	44.279	228.4	1, 3	n.a.
99	-124.981	44.281	626.1	1, 3	n.a.
100	-124.656	44.2943	74.5	AT26-16	EM122	2.6	2014-07-08	03:08:04
101	-124.662	44.3394	100.8	SH1305	EK60	9.8	2013-07-31	06:12:18
102	-125.029	44.451	647.9	SH1507	EK60	63	2015-08-07	13:54:01
103	-124.25	44.4512	66.1	SH1507	EK60	6.4	2015-08-06	22:08:10
104	-124.255	44.4512	68.1	SH1507	EK60	6.6	2015-08-06	22:09:28
105	-124.258	44.4513	69.1	SH1507	EK60	6.7	2015-08-06	22:10:14
106	-124.282	44.4513	70.6	SH1507	EK60	6.9	2015-08-06	22:17:35
107	-124.262	44.4513	69.1	SH1507	EK60	6.7	2015-08-06	22:11:21
108	-124.282	44.4513	70.1	SH1507	EK60	6.8	2015-08-06	22:17:25
109	-124.271	44.4513	69.6	SH1507	EK60	6.8	2015-08-06	22:16:35
110	-124.622	44.4707	142	AT26-02	EM122	5	2013-06-27	12:10:00
111	-124.864	44.5202	258.9	EX1503L2	EM302	9.1	2015-06-07	13:24:53
112	-124.865	44.5213	258.9	EX1503L2	EM302	9.1	2015-06-07	13:25:18
113	-124.867	44.5216	311	EX1503L2	EM302	10.9	2015-06-07	13:25:25
114	-124.866	44.5218	258.9	EX1503L2	EM302	9.1	2015-06-07	13:25:30
115	-124.917	44.533	483.4	1, 3	n.a.
116	-124.472	44.5418	83.1	MF0903	EK60	8.1	2009-07-26	16:54:52
117	-124.526	44.5489	123	SH1405	EK60	12	2014-08-31	16:32:55
118	-124.897	44.558	529.5	1, 3	n.a.
119	-125.15	44.5653	801.5	4	n.a.
120	-125.149	44.5704	788.9	AT26-02	EM122	27.6	2013-07-08	04:18:42
121	-125.148	44.5721	791.8	AT26-02	EM122	27.7	2013-07-08	06:20:47
122	-124.72	44.593	303.4	SH1405	EK60	29.5	2014-09-08	03:20:28
123	-124.872	44.6581	418.3	EX1503L2	EM302	14.6	2015-06-07	14:18:06
124	-124.871	44.6581	418.3	EX1503L2	EM302	14.6	2015-06-07	14:18:06
125	-124.872	44.6585	418.3	EX1503L2	EM302	14.6	2015-06-07	18:18:16
126	-124.871	44.6585	418.3	EX1503L2	EM302	14.6	2015-06-07	18:18:16
127	-124.873	44.6587	418.3	EX1503L2	EM302	14.6	2015-06-07	14:18:13
128	-125.102	44.6658	613.3	AT26-02	EM122	21.5	2013-07-08	08:20:43
129	-125.1	44.6671	612.5	AT26-02	EM122	21.4	2013-07-08	08:43:21
130	-125.102	44.6675	604.4	AT26-02	EM122	21.2	2013-07-08	07:46:41
131	-125.101	44.6677	614.4	AT26-02	EM122	21.5	2013-07-08	07:40:15
132	-125.125	44.675	684.3	1, 5	GLORIA	n.a.
133	-125.292	44.675	2037.4	1, 6	DSRV Alvin	n.a.
134	-125.125	44.675	684.3	4	n.a.
135	-125.285	44.683	2066.6	1, 6	DSRV Alvin	n.a.
136	-125.128	44.6853	741.1	SH1507	EK60	72	2015-08-07	16:15:10
137	-124.883	44.732	545.9	1, 3	n.a.
138	-124.883	44.733	545.9	1, 3	n.a.
139	-124.863	44.7883	488.4	SH1507	EK60	47.5	2015-08-08	09:05:02
140	-124.88	44.7938	487.6	EX1503L2	EM302	17	2015-06-07	15:09:41
141	-124.877	44.794	366.1	EX1503L2	EM302	12.8	2015-06-07	15:09:41
142	-124.882	44.8013	356.5	AT26-02	EM122	12.5	2013-06-27	08:31:58
143	-124.881	44.8013	356.5	AT26-02	EM122	12.5	2013-06-27	08:31:58
144	-124.836	44.836	432.2	1, 3	n.a.
145	-124.963	44.837	778	1, 3	n.a.
146	-124.957	44.841	717.7	1, 3	n.a.
147	-124.884	44.8446	540.7	EX1503L2	EM302	18.9	2015-06-07	15:28:48
148	-124.838	44.847	379.5	1, 3	n.a.
149	-124.889	44.8621	514.7	AT26-02	EM122	18	2013-06-27	08:03:21
150	-124.887	44.8627	519.5	AT26-02	EM122	18.2	2013-06-27	08:03:08
151	-124.885	44.8629	520.5	AT26-02	EM122	18.2	2013-06-27	08:03:06
152	-124.888	44.8638	534.9	AT26-02	EM122	18.7	2013-06-27	08:02:33
153	-124.886	44.864	531.8	AT26-02	EM122	18.6	2013-06-27	08:02:36
154	-124.887	44.8644	531.6	AT26-02	EM122	18.6	2013-06-27	08:02:23
155	-124.885	44.8649	511	EX1503L2	EM302	17.9	2015-06-07	15:36:33
156	-124.886	44.8651	521.3	AT26-02	EM122	18.2	2013-06-27	08:02:07
157	-124.888	44.8655	511	1	n.a.
158	-124.887	44.8655	511	EX1503L2	EM302	17.9	2015-06-07	15:36:46
159	-124.885	44.8657	511	EX1503L2	EM302	17.9	2015-06-07	15:36:48
160	-124.882	44.8664	487.6	EX1503L2	EM302	17	2015-06-07	15:37:02
161	-124.886	44.8667	511	EX1503L2	EM302	17.9	2015-06-07	15:37:13
162	-124.888	44.8672	516.6	AT26-02	EM122	18.1	2016-06-27	08:01:07
163	-124.702	44.8729	349.1	MF0903	EK60	33.9	2009-07-29	06:08:43
164	-124.703	44.8756	349.1	MF0903	EK60	33.9	2009-07-28	00:40:20
165	-124.854	45.0397	680.9	SH1103	EK60	66.2	2011-07-24	22:19:11
166	-124.056	45.0481	49.8	MF0903	EK60	4.8	2009-07-28	19:44:39
167	-124.883	45.1829	742.5	AT26-02	EM122	26	2013-06-26	08:38:52
168	-124.759	45.2289	550.3	AT26-02	EM122	19.3	2013-07-08	13:54:15
169	-124.74	45.2676	514	AT26-02	EM122	18	2013-07-08	14:07:17
170	-124.832	45.2712	795.5	MF0710	EK60	77.3	2007-07-16	13:30:01
171	-124.83	45.2714	786.1	MF0710	EK60	76.4	2007-07-16	13:29:37
172	-124.823	45.2724	776.1	MF0710	EK60	75.4	2007-07-16	13:28:01
173	-124.728	45.286	494	AT26-02	EM122	17.3	2013-07-08	14:13:40
174	-124.727	45.287	491.1	AT26-02	EM122	17.2	2013-07-08	14:14:00
175	-124.727	45.2892	495.9	AT26-02	EM122	17.4	2013-07-08	14:14:40
176	-124.713	45.5769	448.5	MF0710	EK60	43.6	2007-07-17	17:45:30
177	-124.711	45.5786	447.5	MF0710	EK60	43.5	2007-07-17	17:17:12
178	-124.726	45.5805	451.4	MF0710	EK60	43.9	2007-07-17	17:48:18
179	-124.716	45.5813	448.2	MF0710	EK60	43.6	2007-07-17	17:12:06
180	-124.732	45.5824	455.1	MF0710	EK60	44.2	2007-07-17	17:49:39
181	-124.737	45.5842	442.1	MF0710	EK60	43	2007-07-17	17:50:57
182	-124.785	45.598	618.6	MF0710	EK60	60.1	2007-07-17	18:01:45
183	-124.766	45.7062	553.9	SH1103	EK60	53.8	2011-07-26	19:05:49
184	-124.44	45.7714	156.5	AT26-02	EM122	5.5	2013-07-08	17:25:27
185	-124.441	45.7715	157.3	AT26-02	EM122	5.5	2013-07-08	17:25:25
186	-124.725	45.8268	336.4	SH1103	EK60	32.7	2011-07-27	12:35:27
187	-124.724	45.8273	336.4	SH1103	EK60	32.7	2011-07-27	12:35:43
188	-124.392	45.8568	152.6	AT26-02	EM122	5.3	2013-07-08	17:57:02
189	-124.393	45.8572	151.2	AT26-02	EM122	5.3	2013-07-08	17:57:07
190	-124.665	45.8622	215	SH1103	EK60	20.9	2011-07-27	12:54:59
191	-124.665	45.8629	215	SH1103	EK60	20.9	2011-07-27	12:55:16
192	-124.663	45.8645	207	SH1103	EK60	20.1	2011-07-27	12:56:20
193	-124.645	45.8726	200.6	1	n.a.
194	-124.646	45.877	200.1	1	n.a.
195	-124.647	45.8785	200.6	1	n.a.
196	-124.65	45.8805	200.6	1	n.a.
197	-124.639	45.882	193.1	1	n.a.
198	-124.647	45.8825	191.1	1	n.a.
199	-124.643	45.883	198.4	1	n.a.
200	-124.642	45.883	191.2	1	n.a.
201	-124.641	45.884	191.2	1	n.a.
202	-124.639	45.885	191.2	1	n.a.
203	-124.637	45.8857	182.5	1	n.a.
204	-124.638	45.886	191.2	1	n.a.
205	-124.635	45.886	182.5	1	n.a.
206	-124.64	45.9268	198.1	SH1305	EK60	19.3	2013-08-04	14:31:07
207	-124.528	45.9594	159.6	SH1305	EK60	15.5	2013-05-23	13:08:56
208	-124.528	45.9597	159.6	SH1305	EK60	15.5	2013-05-23	13:08:45
209	-125.053	45.9624	1162.1	AT26-19	EM122	40.7	2014-08-28	16:05:50
210	-124.612	45.9648	182.4	SH1204	EK60	17.7	2012-08-04	03:26:24
211	-124.597	45.9649	161.6	SH1204	EK60	15.7	2012-08-04	03:22:04
212	-124.597	45.9649	161.6	SH1204	EK60	15.7	2012-08-04	03:21:55
213	-124.501	46.0398	142.3	SH1103	EK60	13.8	2011-08-03	17:29:10
214	-124.327	46.0401	113.7	SH1103	EK60	11.1	2011-08-03	17:29:26
215	-124.567	46.082	140.6	SH1305	EK60	13.7	2013-05-23	12:34:24
216	-124.567	46.0825	140.6	SH1305	EK60	13.7	2013-05-23	12:34:13
217	-124.568	46.0838	140.6	SH1305	EK60	13.7	2013-05-23	12:33:54
218	-124.733	46.1653	1019.1	AT26-16	EM122	35.7	2014-07-08	19:12:48
219	-124.387	46.1846	120.4	AT26-16	EM122	4.2	2014-07-08	18:05:30
220	-124.386	46.1853	120.4	AT26-16	EM122	4.2	2014-07-08	18:05:30
221	-124.665	46.195	546	1	n.a.
222	-124.657	46.2103	560.2	1	n.a.
223	-124.657	46.213	553.8	1	n.a.
224	-124.666	46.2145	663.7	1	n.a.
225	-124.655	46.2163	530.8	1	n.a.
226	-124.657	46.2222	584.2	1	n.a.
227	-124.653	46.2232	507.4	TN314	EM302	17.7	2014-10-16	15:38:21
228	-124.606	46.2422	799.8	SH1103	EK60	77.7	2011-08-04	00:31:56
229	-124.383	46.2476	142.9	AT26-04	EM122	5	2013-08-26	09:37:27
230	-124.384	46.2485	142.5	AT26-04	EM122	5	2013-08-26	09:36:47
231	-124.391	46.2497	165	AT26-04	EM122	6	2013-08-26	09:34:02
232	-124.252	46.2652	70.7	TN177 1	EM300	2.5	n.a.
233	-124.438	46.2827	215	AT26-04	EM122	7.5	2013-08-26	09:04:30
234	-124.437	46.2835	197	AT26-04	EM122	6.9	2013-08-26	09:04:22
235	-124.436	46.284	210	AT26-04	EM122	7.4	2013-08-26	09:04:34
236	-124.446	46.2875	165	AT26-04	EM122	5.8	2013-08-26	09:00:13
237	-124.45	46.2919	167	AT26-04	EM122	6	2013-08-26	08:57:01
238	-124.467	46.2946	169.1	AT26-04	EM122	5.9	2013-08-26	08:51:10
239	-124.458	46.3008	172.6	AT26-04	EM122	6	2013-08-26	08:51:10
240	-124.485	46.3165	132.5	AT26-04	EM122	4.6	2013-08-26	08:36:44
241	-124.485	46.3171	131.6	AT26-04	EM122	4.6	2013-08-26	08:36:48
242	-124.648	46.3173	517.9	TN314	EM302	18.1	2014-10-17	10:29:57
243	-124.647	46.3193	517.9	TN314	EM302	18.1	2014-10-17	10:31:58
244	-124.51	46.322	133.7	SH1103	EK60	13	2011-08-04	05:27:35
245	-124.508	46.3223	133.7	SH1103	EK60	13	2011-08-04	05:28:05
246	-124.505	46.3228	133.1	SH1103	EK60	12.9	2011-08-04	05:28:41
247	-124.632	46.369	635.2	AT26-18	EM122	22.2	2014-08-24	00:10:25.500000
248	-124.611	46.4104	504	AT26-04	EM122	17.6	2014-08-26	07:28:30
249	-124.549	46.4397	282.1	SH1405	EK60	27.4	2014-09-07	10:03:53
250	-124.559	46.4439	421	TN314	EM302	14.7	2014-10-17	12:36:20
251	-124.559	46.4439	421	TN314	EM302	14.7	2014-10-17	12:36:20
252	-124.792	46.4578	951	AT26-18	EM122	33.3	2014-08-24	09:03:10
253	-124.597	46.4634	915.1	MF0710	EK60	88.9	2007-07-19	14:56:24
254	-124.538	46.4783	505.4	TN314	EM302	17.7	2014-10-17	13:08:41
255	-124.452	46.495	124.5	SH1305	EK60	12.1	2013-08-06	02:45:16
256	-124.452	46.4953	124.5	SH1305	EK60	12.1	2013-08-06	02:45:09
257	-124.441	46.5046	112.6	TN177 1	EM300	3.9	n.a.
258	-124.693	46.5141	532.2	SH1305	EK60	51.7	2013-05-23	10:33:30
259	-124.708	46.6167	555.6	SH1507	EK60	54	2015-08-12	23:13:10
260	-124.706	46.6189	534.7	SH1103	EK60	52	2011-08-05	05:16:22
261	-124.705	46.6192	534.7	SH1103	EK60	52	2011-08-05	05:16:42
262	-124.313	46.644	67.6	TN177 1	EM300	2.4	n.a.
263	-124.454	46.6643	93.6	SH1305	EK60	9.1	2013-08-29	07:46:23
264	-124.454	46.6647	92.7	SH1305	EK60	9	2013-08-29	07:46:23
265	-124.454	46.6649	92.7	SH1305	EK60	9	2013-08-29	07:46:15
266	-124.315	46.6663	68.1	TN177 1	EM300	2.4	n.a.
267	-124.455	46.6674	92.7	SH1305	EK60	9	2013-08-29	07:46:08
268	-124.316	46.6834	65.1	TN177 1	EM300	2.3	n.a.
269	-124.316	46.6998	65.1	TN177 1	EM300	2.3	n.a.
270	-124.317	46.7006	67.8	TN177 1	EM300	2.4	n.a.
271	-124.769	46.7088	194.7	MF0903	EK60	18.9	2009-08-07	23:38:01
272	-124.769	46.7092	194.7	MF0903	EK60	18.9	2009-08-07	20:23:26
273	-124.766	46.7121	194.7	MF0903	EK60	18.9	2009-08-07	20:25:13
274	-124.76	46.7213	175	SH1305	EK60	17	2013-05-23	09:35:11
275	-124.761	46.7222	175.6	SH1305	EK60	17.1	2013-05-23	09:34:59
276	-124.702	46.739	144.7	MF0509	EK60	14.1	2005-08-15	02:17:50
277	-124.383	46.7402	76.6	TN177 1	EM300	2.7	n.a.
278	-125.42	46.7484	1993.5	1, 7	ROV Jason II	n.a.
279	-124.602	46.758	123.8	MF0903	EK60	12	2009-08-08	18:56:42
280	-124.83	46.7726	193.2	SH1405	EK60	18.8	2014-09-07	07:35:19
281	-124.831	46.7733	193.2	SH1405	EK60	18.8	2014-09-07	07:35:01
282	-125.263	46.7811	1072	AT26-04	EM122	37.5	2013-08-25	16:19:31
283	-125.264	46.7815	1049.9	AT26-04	EM122	36.7	2013-08-26	04:36:00
284	-124.781	46.7819	166.3	SH1305	EK60	16.2	2013-05-23	09:18:30
285	-125.264	46.7823	1048.1	1, 7	ROV Jason II	n.a.
286	-125.263	46.7824	1048.1	1, 7	ROV Jason II	n.a.
287	-125.262	46.7829	1048.1	1, 7	ROV Jason II	n.a.
288	-125.264	46.783	1050.7	1, 7	ROV Jason II	n.a.
289	-125.264	46.7833	1050.7	1, 7	ROV Jason II	n.a.
290	-125.262	46.784	1072.8	1, 7	ROV Jason II	n.a.
291	-124.786	46.7967	164.8	SH1305	EK60	16	2013-05-23	09:14:28
292	-124.564	46.8322	101.1	TN177 1	EM300	3.5	n.a.
293	-124.585	46.8336	106.6	TN177 1	EM300	3.7	n.a.
294	-124.499	46.8342	90.6	TN177 1	EM300	3.2	n.a.
295	-124.27	46.8343	45.1	TN177 1	EM300	1.6	n.a.
296	-124.521	46.8345	94.1	TN177 1	EM300	3.3	n.a.
297	-124.426	46.8346	78.1	TN177 1	EM300	2.7	n.a.
298	-124.695	46.8406	132.1	TN207 1	EM300	4.6	n.a.
299	-124.8	46.8434	160.5	SH1305	EK60	15.6	2013-05-23	09:01:45
300	-124.493	46.8458	90.6	TN177 1	EM300	3.2	n.a.
301	-124.541	46.8458	98.7	TN177 1	EM300	3.5	n.a.
302	-124.594	46.8459	107.1	TN177 1	EM300	3.7	n.a.
303	-124.637	46.8611	114.5	MF0903	EK60	11.1	2009-08-08	19:28:34
304	-124.637	46.8614	114.5	MF0903	EK60	11.1	2009-08-08	19:28:44
305	-124.637	46.8618	114.5	MF0903	EK60	11.1	2009-08-08	19:28:50
306	-124.983	46.8628	502.4	SH1103	EK60	48.8	2011-08-06	01:37:42
307	-125.228	46.8652	1154.6	SH1507	EK60	112.2	2015-08-13	21:28:29
308	-124.537	46.8697	92.6	TN177 1	EM300	3.2	n.a.
309	-124.906	46.8722	257.4	SH1103	EK60	25	2011-08-06	01:04:39
310	-124.525	46.8755	91.1	MF0903	EK60	8.9	2009-08-08	13:49:50
311	-124.523	46.8755	91.1	MF0903	EK60	8.9	2009-08-08	13:49:32
312	-124.521	46.8755	91.1	MF0903	EK60	8.9	2009-08-08	13:39:06
313	-124.836	46.8798	170.9	TN207 1	EM300	6	n.a.
314	-124.84	46.8812	178.7	TN207 1	EM300	6.2	n.a.
315	-124.831	46.8814	164.5	TN207 1	EM300	5.8	n.a.
316	-124.832	46.8814	164.5	TN207 1	EM300	5.8	n.a.
317	-124.836	46.8825	170.9	TN207 1	EM300	6	n.a.
318	-124.777	46.885	153.1	1	n.a.
319	-124.777	46.8852	153.1	TN207 1	EM300	5.4	n.a.
320	-124.781	46.8853	155.1	TN207 1	EM300	5.4	n.a.
321	-124.777	46.8858	153.1	TN207 1	EM300	5.4	n.a.
322	-124.778	46.8867	153.1	TN207 1	EM300	5.4	n.a.
323	-124.785	46.8902	158.1	TN207 1	EM300	5.5	n.a.
324	-124.845	46.8907	200.1	TN207 1	EM300	7	n.a.
325	-124.717	46.8915	135	TN177 1	EM300	4.7	n.a.
326	-124.618	46.8935	107.2	TN177 1	EM300	3.7	n.a.
327	-124.812	46.894	180.8	TN207 1	EM300	6.3	n.a.
328	-124.876	46.8984	286.8	TN207 1	EM300	10	n.a.
329	-124.633	46.8997	109.5	TN177 1	EM300	3.8	n.a.
330	-124.686	46.9052	125.8	TN177 1	EM300	4.4	n.a.
331	-124.818	46.9091	155.4	TN207 1	EM300	5.4	n.a.
332	-124.516	46.91	87.6	TN177 1	EM300	3.1	n.a.
333	-124.894	46.9155	194.3	TN207 1	EM300	6.8	n.a.
334	-124.515	46.9159	86.3	TN177 1	EM300	3	n.a.
335	-124.903	46.9163	307.3	TN207 1	EM300	10.7	n.a.
336	-124.661	46.9173	114.5	TN177 1	EM300	4	n.a.
337	-124.927	46.919	513.5	TN207 1	EM300	18	n.a.
338	-124.889	46.9194	232.6	TN207 1	EM300	8.1	n.a.
339	-124.517	46.9265	84.1	TN207 1	EM300	2.9	n.a.
340	-124.522	46.9319	84	TN177 1	EM300	2.9	n.a.
341	-124.484	46.9333	77.6	SH1305	EK60	7.5	2013-08-07	00:40:45
342	-124.483	46.9334	77.6	SH1305	EK60	7.5	2013-08-07	00:40:33
343	-124.48	46.9337	77.6	SH1305	EK60	7.5	2013-08-07	00:39:56
344	-124.478	46.9339	76.6	SH1305	EK60	7.4	2013-08-07	00:39:27
345	-124.468	46.9349	72.1	SH1305	EK60	7	2013-08-07	00:36:49
346	-124.466	46.935	71.6	SH1305	EK60	7	2013-08-07	00:36:34
347	-124.465	46.9351	71.6	SH1305	EK60	7	2013-08-07	00:36:16
348	-124.584	46.9362	94.1	SH1305	EK60	9.1	2013-08-29	06:12:05
349	-124.604	46.9363	100.6	SH1305	EK60	9.8	2013-08-07	09:32:19
350	-124.605	46.9374	99	SH1305	EK60	9.6	2013-08-07	09:31:40
351	-124.605	46.9376	99	SH1305	EK60	9.6	2013-08-07	09:31:35
352	-124.605	46.938	99	SH1305	EK60	9.6	2013-08-07	09:31:28
353	-124.605	46.9385	99	SH1305	EK60	9.6	2013-08-07	09:31:16
354	-124.605	46.939	99	SH1305	EK60	9.6	2013-08-07	09:30:37
355	-124.606	46.9394	99	SH1305	EK60	9.6	2013-08-07	09:30:20
356	-124.955	46.9406	238.9	TN207 1	EM300	8.4	n.a.
357	-124.957	46.9422	218	TN207 1	EM300	7.6	n.a.
358	-124.934	46.9447	220.1	TN207 1	EM300	7.7	n.a.
359	-124.934	46.945	220.1	TN207 1	EM300	7.7	n.a.
360	-124.917	46.9461	207.5	TN207 1	EM300	7.3	n.a.
361	-124.824	46.9507	272.8	SH1305	EK60	26.5	2013-05-23	08:32:48
362	-124.916	46.9517	204.3	TN207 1	EM300	7.1	n.a.
363	-124.92	46.9548	197.9	TN207 1	EM300	6.9	n.a.
364	-124.94	46.956	207.6	TN207 1	EM300	7.3	n.a.
365	-124.944	46.9589	210.1	TN207 1	EM300	7.3	n.a.
366	-124.921	46.9619	178.3	TN207 1	EM300	6.2	n.a.
367	-125.029	46.962	583.2	SH1405	EK60	56.7	2014-09-03	15:30:44
368	-124.826	46.963	216.2	SH1305	EK60	21	2013-05-23	08:29:28
369	-124.744	46.9634	139.7	SH1103	EK60	13.6	2011-08-06	04:10:13
370	-124.923	46.9638	173.1	TN207 1	EM300	6.1	n.a.
371	-124.919	46.967	173.1	TN207 1	EM300	6.1	n.a.
372	-124.941	46.97	192.8	TN207 1	EM300	6.7	n.a.
373	-124.964	46.9729	196	TN207 1	EM300	6.9	n.a.
374	-124.967	46.9757	270.7	TN207 1	EM300	9.5	n.a.
375	-124.95	46.9764	168.8	TN207 1	EM300	5.9	n.a.
376	-124.971	46.9813	177.5	TN207 1	EM300	6.2	n.a.
377	-124.978	46.983	299.5	TN207 1	EM300	10.5	n.a.
378	-124.961	46.9842	164.6	TN207 1	EM300	5.8	n.a.
379	-124.962	46.9847	164.6	TN207 1	EM300	5.8	n.a.
380	-124.948	46.9881	156.9	TN207 1	EM300	5.5	n.a.
381	-124.944	46.989	157.3	TN207 1	EM300	5.5	n.a.
382	-124.941	46.9895	155.1	TN207 1	EM300	5.4	n.a.
383	-124.948	46.9917	155.1	TN207 1	EM300	5.4	n.a.
384	-124.964	46.993	160	TN207 1	EM300	5.6	n.a.
385	-124.975	46.9936	184.5	TN207 1	EM300	6.5	n.a.
386	-124.948	46.9936	155.1	TN207 1	EM300	5.4	n.a.
387	-124.961	46.9943	156.5	TN207 1	EM300	5.5	n.a.
388	-124.944	46.9945	155.6	TN207 1	EM300	5.4	n.a.
389	-124.948	46.9945	155.1	TN207 1	EM300	5.4	n.a.
390	-124.945	46.995	155.6	TN207 1	EM300	5.4	n.a.
391	-124.974	46.9952	185.6	TN207 1	EM300	6.5	n.a.
392	-124.958	46.9952	155.3	TN207 1	EM300	5.4	n.a.
393	-124.966	46.9954	159.3	TN207 1	EM300	5.6	n.a.
394	-124.949	46.9959	155.1	TN207 1	EM300	5.4	n.a.
395	-124.939	46.9963	155.6	TN207 1	EM300	5.4	n.a.
396	-124.944	46.9982	155.6	TN207 1	EM300	5.4	n.a.
397	-124.972	46.9988	183.1	TN207 1	EM300	6.4	n.a.
398	-124.973	46.9988	183.1	TN207 1	EM300	6.4	n.a.
399	-124.971	47.0013	165.1	TN207 1	EM300	5.8	n.a.
400	-124.957	47.0072	163	TN207 1	EM300	5.7	n.a.
401	-124.966	47.0075	164	TN207 1	EM300	5.7	n.a.
402	-125.578	47.0148	1481.2	TN313	EM302	51.8	2014-10-05	19:30:46
403	-124.948	47.0158	164.5	TN314	EM302	5.8	2014-10-17	23:05:16
404	-124.933	47.042	204.8	MF0903	EK60	19.9	2009-08-09	14:11:48
405	-124.762	47.0461	126.3	SH1103	EK60	12.3	2011-08-06	17:18:16
406	-125.078	47.0578	1379.1	1	n.a.
407	-125.054	47.0584	1276.1	1	n.a.
408	-124.786	47.0722	129.4	MF0509	EK60	12.6	2005-08-14	20:58:19
409	-124.942	47.0723	250.7	MF0509	EK60	24.4	2005-08-14	20:19:00
410	-124.582	47.0726	78.1	MF0509	EK60	7.6	2005-08-14	21:42:54
411	-125.059	47.0828	1097.4	1	n.a.
412	-125.057	47.0832	1097.4	1	n.a.
413	-124.9	47.0942	151.3	SH1305	EK60	14.7	2013-08-07	15:24:24
414	-124.887	47.0943	150.7	SH1305	EK60	14.6	2013-08-07	15:21:29
415	-124.886	47.0943	150.7	SH1305	EK60	14.6	2013-08-07	15:21:09
416	-125.006	47.1842	522	TN314	EM302	18.3	2014-10-18	01:42:00
417	-125.006	47.1843	522	TN314	EM302	18.3	2014-10-18	01:42:00
418	-125.006	47.1843	522	TN314	EM302	18.3	2014-10-18	06:33:50
419	-125.006	47.1845	522	TN314	EM302	18.3	2014-10-18	06:33:50
420	-125.005	47.1846	522	TN314	EM302	18.3	2014-10-18	08:00:19
421	-125.023	47.1875	562.2	TN314	EM302	19.7	2014-10-18	05:43:43
422	-125.023	47.1876	562.2	TN314	EM302	19.7	2014-10-18	05:58:39
423	-124.579	47.2085	74.1	MF0903	EK60	7.2	2009-08-10	01:42:12
424	-124.581	47.2085	76.6	MF0903	EK60	7.4	2009-08-10	01:42:45
425	-124.581	47.2085	76.6	MF0903	EK60	7.4	2009-08-10	01:42:37
426	-124.586	47.2086	77.1	MF0903	EK60	7.5	2009-08-10	01:43:44
427	-124.587	47.2086	77.1	MF0903	EK60	7.5	2009-08-10	01:43:49
428	-125.034	47.2536	515	TN314	EM302	18	2014-10-18	08:44:15
429	-125.034	47.2539	515	TN314	EM302	18	2014-10-18	08:45:20
430	-125.035	47.254	515	TN314	EM302	18	2014-10-18	08:46:21
431	-125.034	47.254	515	TN314	EM302	18	2014-10-18	08:44:06
432	-125.034	47.2541	515	TN314	EM302	18	2014-10-18	10:02:54
433	-125.034	47.2541	515	TN314	EM302	18	2014-10-18	10:02:54
434	-125.034	47.2541	515	TN314	EM302	18	2014-10-18	10:13:00
435	-125.035	47.2541	515	TN314	EM302	18	2014-10-18	10:12:45
436	-125.034	47.2541	515	TN314	EM302	18	2014-10-18	08:46:21
437	-125.032	47.2542	498.8	TN314	EM302	17.4	2014-10-18	10:13:27
438	-125.035	47.2544	515	TN314	EM302	18	2014-10-18	10:03:32
439	-125.034	47.2548	515	TN314	EM302	18	2014-10-18	10:04:33
440	-125.035	47.2548	515	TN314	EM302	18	2014-10-18	10:04:33
441	-124.631	47.2559	88.7	SH1305	EK60	8.6	2013-08-08	03:34:25
442	-124.625	47.2598	88	SH1305	EK60	8.6	2013-08-08	01:33:56
443	-124.818	47.261	164.1	SH1305	EK60	15.9	2013-08-08	00:50:10
444	-124.817	47.261	165.1	SH1305	EK60	16	2013-08-08	00:50:10
445	-124.815	47.261	165.1	SH1305	EK60	16	2013-08-08	00:50:29
446	-124.814	47.261	165.1	SH1305	EK60	16	2013-08-08	00:51:15
447	-124.463	47.2611	49.6	SH1305	EK60	4.8	2013-08-08	02:10:13
448	-124.72	47.273	121.1	TN177 1	EM300	4.2	n.a.
449	-124.973	47.2869	1018.6	EX1503L2	EM302	35.6	2015-06-08	07:29:25
450	-124.973	47.2869	1018.6	EX1503L2	EM302	35.6	2015-06-08	07:29:25
451	-124.775	47.366	174	SH1103	EK60	16.9	2011-08-08	01:45:08
452	-124.716	47.375	113	MF0903	EK60	11	2009-08-11	03:01:03
453	-124.753	47.3841	136.6	TN177 1	EM300	4.8	n.a.
454	-125.017	47.428	858.1	SH1204	EK60	83.4	2012-08-07	11:47:03
455	-124.895	47.4653	440	SH1204	EK60	42.8	2012-08-07	02:03:16
456	-125.008	47.5234	523.4	TN314	EM302	18.3	2014-10-15	12:30:33
457	-125.008	47.5235	523.4	TN314	EM302	18.3	2014-10-15	12:30:33
458	-125.394	47.5393	585.3	SH1103	EK60	56.9	2011-08-08	18:15:04
459	-125.054	47.5556	419.5	MF0903	EK60	40.8	2009-08-11	20:27:32
460	-125.052	47.5565	364.3	SH1405	EK60	35.4	2014-09-07	01:41:27
461	-125.068	47.5763	321.1	1	n.a.
462	-125.07	47.5766	352.9	1	n.a.
463	-125.071	47.5772	352.9	1	n.a.
464	-125.065	47.5773	321.1	1	n.a.
465	-125.072	47.5774	352.9	1	n.a.
466	-125.065	47.5781	321.1	1	n.a.
467	-125.066	47.5788	299	1	n.a.
468	-125.065	47.579	299	1	n.a.
469	-125.066	47.5791	299	1	n.a.
470	-125.065	47.5792	299	1	n.a.
471	-125.065	47.5792	299	1	n.a.
472	-125.066	47.5793	299	1	n.a.
473	-125.063	47.5794	271.3	SH1405	EK60	26.4	2014-09-07	01:33:28
474	-125.059	47.5828	237.3	1	n.a.
475	-125.057	47.5833	237.3	1	n.a.
476	-125.054	47.584	223.4	1	n.a.
477	-125.008	47.5917	181.6	SH1103	EK60	17.6	2011-08-08	10:58:13
478	-125.05	47.5939	202.7	SH1305	EK60	19.7	2013-08-09	00:20:43
479	-125.05	47.594	202.7	SH1305	EK60	19.7	2013-08-09	00:20:53
480	-125.044	47.5941	195.4	SH1305	EK60	19	2013-08-09	00:22:17
481	-124.682	47.5941	66.6	SH1305	EK60	6.5	2013-08-09	00:29:28
482	-125.04	47.5941	192.5	SH1305	EK60	18.7	2013-08-09	00:23:21
483	-125.039	47.5941	192.5	SH1305	EK60	18.7	2013-08-09	00:23:40
484	-125.038	47.5942	192.5	SH1305	EK60	18.7	2013-08-09	00:23:52
485	-125.037	47.5942	192.1	SH1305	EK60	18.7	2013-08-09	00:24:01
486	-125.037	47.5942	192.1	SH1305	EK60	18.7	2013-08-09	00:24:13
487	-125.035	47.5942	192.1	SH1305	EK60	18.7	2013-08-09	00:24:35
488	-125.034	47.5942	192.1	SH1305	EK60	18.7	2013-08-09	00:24:47
489	-124.549	47.5942	36.6	SH1305	EK60	3.6	2013-08-09	03:51:07
490	-124.548	47.5942	36.6	SH1305	EK60	3.6	2013-08-09	03:51:30
491	-124.548	47.5942	36.6	SH1305	EK60	3.6	2013-08-09	03:51:42
492	-124.553	47.5943	37.1	SH1305	EK60	3.6	2013-08-09	03:50:01
493	-124.556	47.5943	38.6	SH1305	EK60	3.8	2013-08-09	03:49:28
494	-124.563	47.5944	39.6	SH1305	EK60	3.8	2013-08-09	03:47:52
495	-124.565	47.5944	39.6	SH1305	EK60	3.8	2013-08-09	03:47:24
496	-124.566	47.5944	39.6	SH1305	EK60	3.8	2013-08-09	03:47:05
497	-124.569	47.5945	41.5	SH1305	EK60	4	2013-08-09	03:46:24
498	-125.025	47.5945	191	SH1305	EK60	18.6	2013-08-09	00:26:58
499	-124.608	47.5945	49.6	SH1305	EK60	4.8	2013-08-09	03:37:28
500	-125.013	47.5946	182.6	SH1305	EK60	17.7	2013-08-09	00:29:28
501	-125.015	47.5946	182.6	SH1305	EK60	17.7	2013-08-09	00:29:28
502	-124.579	47.5946	43.1	SH1305	EK60	4.2	2013-08-09	03:44:03
503	-124.601	47.5947	48.6	SH1305	EK60	4.7	2013-08-09	03:39:05
504	-124.583	47.5947	43.1	SH1305	EK60	4.2	2013-08-09	03:43:12
505	-124.585	47.5948	43.1	SH1305	EK60	4.2	2013-08-09	03:42:39
506	-124.593	47.5949	44.6	SH1305	EK60	4.3	2013-08-09	03:40:57
507	-124.545	47.5952	36.1	SH1305	EK60	3.5	2013-08-09	03:53:12
508	-125.015	47.5986	182.4	SH1103	EK60	17.7	2011-08-08	10:54:45
509	-125.016	47.5997	183.1	SH1103	EK60	17.8	2011-08-08	10:54:13
510	-125.018	47.6012	182.6	SH1103	EK60	17.7	2011-08-08	10:53:28
511	-125.021	47.6049	184.9	SH1103	EK60	18	2011-08-08	10:51:38
512	-125.05	47.739	161.1	SH1103	EK60	15.7	2011-08-09	20:29:45
513	-125.05	47.739	161.1	SH1103	EK60	15.7	2011-08-09	20:29:44
514	-125.038	47.7399	157.6	SH1305	EK60	15.3	2013-05-23	04:58:17
515	-125.048	47.7402	161.1	SH1103	EK60	15.7	2011-08-09	20:30:32
516	-125.047	47.7403	161.1	SH1103	EK60	15.7	2011-08-09	20:30:32
517	-124.919	47.7415	107.1	SH1103	EK60	10.4	2011-08-09	12:36:22
518	-125.058	47.7519	167.9	MF0710	EK60	16.3	2007-07-24	00:30:05
519	-124.999	47.7609	132.1	SH1305	EK60	12.8	2013-08-09	14:36:05
520	-125.049	47.7786	150.3	SH1305	EK60	14.6	2013-05-23	04:47:27
521	-125.049	47.7786	150.3	SH1305	EK60	14.6	2013-05-23	04:45:32
522	-125.051	47.7855	155.3	SH1305	EK60	15.1	2013-05-23	04:45:31
523	-125.106	47.7984	249.7	SH1204	EK60	24.3	2012-08-08	17:07:33
524	-125.082	47.8033	197.3	SH1405	EK60	19.2	2014-09-03	21:27:07
525	-125.444	47.8111	795.8	SH1204	EK60	77.3	2012-08-08	15:24:05
526	-125.042	47.8215	137.8	SH1103	EK60	13.4	2011-08-09	11:45:42
527	-125.042	47.8216	137.8	SH1103	EK60	13.4	2011-08-09	11:45:39
528	-125.078	47.8238	174.7	SH1405	EK60	17	2014-09-03	21:34:30
529	-125.244	47.8426	472.4	TN314 1	EM302	16.5	n.a.
530	-125.25	47.8427	480.2	1	n.a.
531	-125.244	47.843	473.5	TN314 1	EM302	16.6	n.a.
532	-125.25	47.8437	480.2	1	n.a.
533	-125.25	47.8441	480.2	TN314 1	EM302	16.8	n.a.
534	-125.25	47.8441	480.2	1	n.a.
535	-125.08	47.8444	153.8	SH1103	EK60	14.9	2011-08-09	11:31:21
536	-125.081	47.8445	153.8	SH1103	EK60	14.9	2011-08-09	11:31:19
537	-125.067	47.8456	142.8	SH1305	EK60	13.9	2013-05-23	04:28:52
538	-125.067	47.8456	142.8	SH1305	EK60	13.9	2013-05-23	04:28:53
539	-125.067	47.8475	142	SH1305	EK60	13.8	2013-05-23	04:28:23
540	-125.087	47.8485	158.1	SH1103	EK60	15.4	2011-08-09	11:29:11
541	-125.113	47.8633	166.7	SH1103	EK60	16.2	2011-08-09	11:21:48
542	-125.113	47.8633	166.7	SH1103	EK60	16.2	2011-08-09	11:21:41
543	-125.187	47.8694	247.9	SH1103	EK60	24.1	2011-08-09	23:34:25
544	-125.187	47.8694	247.9	SH1103	EK60	24.1	2011-08-09	23:34:25
545	-125.577	47.873	668.1	SH1103	EK60	64.9	2011-08-10	03:16:56
546	-125.58	47.873	696.6	SH1103	EK60	67.7	2011-08-10	03:17:28
547	-125.326	47.8737	526.3	SH1103	EK60	51.2	2011-08-10	02:17:40
548	-125.318	47.8738	498.4	SH1103	EK60	48.4	2011-08-10	02:15:55
549	-125.337	47.8746	598.6	MF0903	EK60	58.2	2009-08-20	15:20:01
550	-125.337	47.8746	598.6	MF0903	EK60	58.2	2009-08-20	15:19:45
551	-125.324	47.8746	526.3	MF0903	EK60	51.2	2009-08-20	15:17:28
552	-125.051	47.8753	133.7	MF0903	EK60	13	2009-08-20	14:21:31
553	-125.051	47.8753	133.7	MF0903	EK60	13	2009-08-20	14:21:31
554	-125.048	47.8753	133.2	MF0903	EK60	12.9	2009-08-20	14:20:55
555	-125.048	47.8753	133.2	MF0903	EK60	12.9	2009-08-20	14:20:56
556	-125.047	47.8753	133.2	MF0903	EK60	12.9	2009-08-20	14:20:44
557	-125.047	47.8753	133.2	MF0903	EK60	12.9	2009-08-20	14:20:44
558	-125.051	47.8754	133.7	MF0903	EK60	13	2009-08-13	14:14:06
559	-125.047	47.8755	133.2	MF0903	EK60	12.9	2009-08-13	14:13:21
560	-125.048	47.8755	133.2	MF0903	EK60	12.9	2009-08-13	14:13:33
561	-125.319	47.8755	511	MF0903	EK60	49.7	2009-08-20	20:45:34
562	-125.325	47.8756	526.3	MF0903	EK60	51.2	2009-08-20	20:46:52
563	-125.325	47.8756	526.3	MF0903	EK60	51.2	2009-08-20	20:46:53
564	-125.325	47.8757	526.3	MF0903	EK60	51.2	2009-08-20	10:08:58
565	-125.047	47.8758	133.2	MF0903	EK60	12.9	2009-08-20	11:02:00
566	-125.049	47.8758	133.2	MF0903	EK60	12.9	2009-08-20	11:01:42
567	-125.049	47.8758	133.2	MF0903	EK60	12.9	2009-08-20	11:01:42
568	-125.154	47.8874	170.1	SH1103	EK60	16.5	2011-08-09	11:09:46
569	-125.57	47.9042	360.8	TN314	EM302	12.6	2014-10-13	09:13:28
570	-125.633	47.9057	538.6	MF0509	EK60	52.3	2005-08-13	20:44:53
571	-125.624	47.9125	477.5	TN314	EM302	16.7	2014-10-12	07:38:08
572	-125.635	47.9143	529.2	TN314	EM302	18.5	2014-10-12	07:36:14
573	-125.629	47.9149	511	TN314	EM302	17.9	2014-10-12	07:35:50
574	-125.637	47.9154	538.6	TN314	EM302	18.8	2014-10-12	07:46:26
575	-125.636	47.9154	538.6	TN314	EM302	18.8	2014-10-12	19:23:15
576	-125.627	47.9195	488.6	SH1103	EK60	47.5	2011-08-10	04:41:28
577	-125.653	47.922	571.7	1	n.a.
578	-125.627	47.9256	498.7	TN314	EM302	17.4	2014-10-13	08:10:33
579	-125.062	47.9261	127.5	SH1305	EK60	12.4	2013-08-09	23:15:23
580	-125.626	47.9267	466.7	TN314	EM302	16.3	2014-10-13	08:09:54
581	-125.18	47.9269	169.4	SH1305	EK60	16.5	2013-08-09	22:46:54
582	-125.182	47.9269	169.4	SH1305	EK60	16.5	2013-08-09	22:45:53
583	-125.186	47.927	171.3	SH1305	EK60	16.6	2013-08-09	22:45:30
584	-125.202	47.9273	176.1	SH1305	EK60	17.1	2013-08-09	22:41:41
585	-125.641	47.9287	533.8	1	n.a.
586	-125.645	47.9288	544.5	1	n.a.
587	-125.64	47.9295	533.8	TN314 1	EM302	18.7	n.a.
588	-125.639	47.9298	518.6	1	n.a.
589	-125.641	47.93	542.5	1	n.a.
590	-125.171	47.9339	167.3	SH1405	EK60	16.3	2014-09-06	23:26:59
591	-125.678	47.9345	600.6	TN314	EM302	21	2014-10-12	09:53:59
592	-125.178	47.9361	167.6	MF0710	EK60	16.3	2007-07-24	17:29:15
593	-125.675	47.9362	602.8	MF0710	EK60	58.6	2007-07-24	19:10:44
594	-125.675	47.9362	602.8	MF0710	EK60	58.6	2007-07-24	19:10:46
595	-125.57	47.9368	203.9	MF0710	EK60	19.8	2007-07-24	18:50:26
596	-125.559	47.9371	217.7	MF0710	EK60	21.2	2007-07-24	18:48:16
597	-125.545	47.9372	239.1	MF0710	EK60	23.2	2007-07-24	18:46:02
598	-125.631	47.9386	531.6	TN314	EM302	18.6	2014-10-12	10:26:15
599	-125.631	47.9387	531.6	TN314	EM302	18.6	2014-10-12	22:42:48
600	-125.631	47.939	513.9	TN314	EM302	18	2014-10-12	10:26:30
601	-125.631	47.9408	529.9	TN314	EM302	18.5	2014-10-12	10:26:12
602	-125.17	47.9413	166.6	SH1405	EK60	16.2	2014-09-06	23:26:59
603	-125.572	47.9528	220.4	SH1204	EK60	21.4	2012-08-09	10:10:47
604	-125.572	47.9528	220.4	SH1204	EK60	21.4	2012-08-09	10:10:47
605	-125.488	47.9553	201	SH1103	EK60	19.5	2011-08-11	01:52:30
606	-125.493	47.9576	185.4	MF0710	EK60	18	2007-07-25	20:42:08
607	-125.496	47.9591	185.3	SH1103	EK60	18	2011-08-10	05:08:47
608	-125.496	47.9618	177.9	SH1204	EK60	17.3	2012-08-09	09:56:06
609	-125.497	47.9647	177.9	SH1204	EK60	17.3	2012-08-08	23:43:16
610	-125.498	47.9647	177.9	SH1204	EK60	17.3	2012-08-08	23:43:36
611	-125.499	47.9647	177.9	SH1204	EK60	17.3	2012-08-08	23:43:54
612	-125.503	47.9647	177.4	SH1204	EK60	17.2	2012-08-08	23:45:09
613	-125.504	47.9647	177.8	SH1204	EK60	17.3	2012-08-08	23:45:33
614	-125.53	47.9649	185.2	SH1204	EK60	18	2012-08-08	23:53:36
615	-125.528	47.9649	185.2	SH1204	EK60	18	2012-08-08	23:53:00
616	-125.527	47.9649	185.2	SH1204	EK60	18	2012-08-08	23:52:41
617	-125.526	47.9649	185.2	SH1204	EK60	18	2012-08-08	23:52:29
618	-125.525	47.9649	185.2	SH1204	EK60	18	2012-08-08	23:52:16
619	-125.525	47.9649	182.2	SH1204	EK60	17.7	2012-08-08	23:52:03
620	-125.521	47.9649	182.2	SH1204	EK60	17.7	2012-08-08	23:51:00
621	-125.524	47.9649	182.2	SH1204	EK60	17.7	2012-08-08	23:51:47
622	-125.522	47.9649	182.2	SH1204	EK60	17.7	2012-08-08	23:51:24
623	-125.523	47.9649	182.2	SH1204	EK60	17.7	2012-08-08	23:51:30
624	-125.168	47.9656	157.5	SH1405	EK60	15.3	2014-09-06	23:16:34
625	-125.512	47.9659	174.2	MF0710	EK60	16.9	2007-07-25	20:35:48
626	-125.435	47.9931	173.8	SH1103	EK60	16.9	2011-08-21	14:28:23
627	-125.435	47.9931	173.8	SH1103	EK60	16.9	2011-08-09	12:36:40
628	-125.435	47.9936	173.8	SH1103	EK60	16.9	2011-08-21	14:28:13
629	-125.435	47.9936	173.8	SH1103	EK60	16.9	2011-08-09	12:36:31
630	-125.313	47.9962	183.5	SH1103	EK60	17.8	2011-08-21	17:26:22
631	-125.343	47.9966	541.8	SH1103	EK60	52.7	2011-08-10	05:37:41
632	-125.341	47.9969	541.8	SH1103	EK60	52.7	2011-08-22	04:46:25
633	-125.341	47.9969	541.8	SH1103	EK60	52.7	2011-08-10	05:37:58
634	-125.422	47.9978	199	SH1103	EK60	19.3	2011-08-21	14:23:09
635	-125.421	47.9978	199	SH1103	EK60	19.3	2011-08-21	14:23:29
636	-125.42	47.9978	269.4	SH1103	EK60	26.2	2011-08-21	14:22:47
637	-125.42	47.9982	199	SH1103	EK60	19.3	2011-08-22	07:43:41
638	-125.419	48.0003	216.5	SH1103	EK60	21	2011-08-21	13:10:37
639	-125.422	48.0004	186.9	SH1103	EK60	18.2	2011-08-21	13:12:27
640	-125.423	48.0005	186.9	SH1103	EK60	18.2	2011-08-21	13:12:55
641	-125.334	48.0012	432	SH1103	EK60	42	2011-08-22	01:31:54
642	-125.346	48.0017	573.8	SH1103	EK60	55.8	2011-08-09	10:13:08
643	-125.345	48.002	511.8	SH1103	EK60	49.7	2011-08-21	23:04:13
644	-125.334	48.0021	432	SH1103	EK60	42	2011-08-21	23:01:05
645	-125.663	48.0278	449.1	1	n.a.
646	-125.371	48.0296	468.2	SH1103	EK60	45.5	2011-08-21	07:12:12
647	-125.372	48.0305	468.2	SH1103	EK60	45.5	2011-08-21	01:29:00
648	-125.544	48.0339	166.1	SH1103	EK60	16.1	2011-08-10	11:02:12
649	-125.549	48.0341	167.6	SH1103	EK60	16.3	2011-08-10	11:03:17
650	-125.55	48.0342	167.6	SH1103	EK60	16.3	2011-08-10	11:03:40
651	-125.553	48.0343	169.1	SH1103	EK60	16.4	2011-08-10	11:04:22
652	-125.662	48.0344	441.8	TN314	EM302	15.4	2014-10-12	05:49:01
653	-125.558	48.0345	171.6	SH1103	EK60	16.7	2011-08-10	11:05:32
654	-125.561	48.0347	173.6	SH1103	EK60	16.9	2011-08-10	11:06:10
655	-125.561	48.0347	173.6	SH1103	EK60	16.9	2011-08-10	11:06:20
656	-125.565	48.0351	175.6	SH1103	EK60	17.1	2011-08-10	11:07:12
657	-125.395	48.0377	170.4	MF0903	EK60	16.6	2009-08-20	03:55:12
658	-125.395	48.0377	170.4	MF0903	EK60	16.6	2009-08-20	03:55:13
659	-125.394	48.0377	170.4	MF0903	EK60	16.6	2009-08-20	03:55:03
660	-125.666	48.0392	476.1	1	n.a.
661	-125.806	48.0392	833.2	SH1103	EK60	81	2011-08-10	14:03:47
662	-125.545	48.0394	165.9	SH1103	EK60	16.1	2011-08-10	15:02:13
663	-125.395	48.0395	170.4	SH1103	EK60	16.6	2011-08-10	15:36:25
664	-125.394	48.0395	170.4	SH1103	EK60	16.6	2011-08-20	15:23:43
665	-125.666	48.0397	434.1	SH1103	EK60	42.2	2011-08-10	14:35:00
666	-125.666	48.0398	490	1	n.a.
667	-125.397	48.0419	147	MF0903	EK60	14.3	2009-08-13	19:50:01
668	-125.374	48.0419	235.4	MF0903	EK60	22.9	2009-08-13	19:54:04
669	-125.397	48.0421	147	MF0903	EK60	14.3	2009-08-21	01:28:49
670	-125.397	48.0421	147	MF0903	EK60	14.3	2009-08-21	01:28:48
671	-125.397	48.0423	147	MF0710	EK60	14.3	2007-07-25	23:19:06
672	-125.574	48.0427	176.1	MF0903	EK60	17.1	2009-08-13	19:17:33
673	-125.395	48.0439	147	MF0710	EK60	14.3	2007-07-25	23:19:46
674	-125.426	48.0538	131	MF0509	EK60	12.7	2005-08-13	03:45:13
675	-125.427	48.0542	131	MF0509	EK60	12.7	2005-08-13	03:44:59
676	-125.427	48.0545	131	MF0509	EK60	12.7	2005-08-13	03:44:46
677	-125.429	48.0562	131	MF0509	EK60	12.7	2005-08-13	03:44:19
678	-125.43	48.0566	131	MF0509	EK60	12.7	2005-08-13	03:44:10
679	-125.431	48.0572	131	MF0509	EK60	12.7	2005-08-13	03:43:56
680	-124.963	48.067	102	TN177 1	EM300	3.6	n.a.
681	-125.001	48.0726	118.8	MF0509	EK60	11.5	2005-08-13	14:41:39
682	-125.003	48.0726	120.7	MF0509	EK60	11.7	2005-08-13	14:40:35
683	-125.008	48.0726	124.9	MF0509	EK60	12.1	2005-08-13	14:40:22
684	-125.517	48.0939	142.1	SH1305	EK60	13.8	2013-08-14	18:16:07
685	-125.517	48.0939	142.1	SH1305	EK60	13.8	2013-08-14	18:16:15
686	-125.518	48.0939	142.1	SH1305	EK60	13.8	2013-08-14	18:16:25
687	-125.519	48.094	142.1	SH1305	EK60	13.8	2013-08-14	18:16:42
688	-125.521	48.094	142.1	SH1305	EK60	13.8	2013-08-14	18:16:56
689	-125.555	48.1028	147.2	FK009A	EK60	14.3	2013-08-21	23:19:24
690	-125.774	48.1033	509	MF0710	EK60	49.5	2007-07-24	00:25:29
691	-125.556	48.1035	147.2	FK009A	EK60	14.3	2013-08-21	23:18:52
692	-125.558	48.1044	148.3	FK009A	EK60	14.4	2013-08-21	23:18:28
693	-125.559	48.1049	148.3	FK009A	EK60	14.4	2013-08-21	23:18:04
694	-125.56	48.1054	148.3	FK009A	EK60	14.4	2013-08-21	23:17:47
695	-124.978	48.1074	121.5	TN177 1	EM300	4.2	n.a.
696	-125.773	48.1111	461	MF0710	EK60	44.8	2007-07-25	02:33:04
697	-125.78	48.1136	482	MF0710	EK60	46.8	2007-07-25	02:31:31
698	-125.55	48.1171	142.8	SH1507	EK60	13.9	2015-08-17	18:41:54
699	-125.548	48.1172	142.8	SH1507	EK60	13.9	2015-08-17	18:42:11
700	-125.549	48.1172	142.8	SH1507	EK60	13.9	2015-08-17	18:42:00
701	-125.547	48.1174	142.8	SH1507	EK60	13.9	2015-08-18	17:25:47
702	-125.548	48.1175	142.8	SH1507	EK60	13.9	2015-08-18	17:25:58
703	-125.549	48.1175	142.8	SH1507	EK60	13.9	2015-08-18	17:26:10
704	-125.08	48.1316	282.9	SH1204	EK60	27.5	2012-08-09	17:33:29
705	-125.077	48.1316	263.9	SH1204	EK60	25.6	2012-08-09	17:33:44
706	-125.073	48.1317	222	SH1204	EK60	21.6	2012-08-09	17:35:41
707	-125.46	48.1584	127.6	FK009A	EK60	12.4	2013-08-24	10:35:38
708	-125.46	48.1601	127.6	TN313	EM302	4.5	2014-10-05	05:58:39
709	-125.458	48.1602	124.8	TN313	EM302	4.4	2014-10-05	05:58:53
710	-125.459	48.1603	124.8	TN313	EM302	4.4	2014-10-05	05:58:46
711	-125.459	48.1603	124.8	TN313	EM302	4.4	2014-10-05	05:58:46
712	-125.46	48.1604	127.6	TN313	EM302	4.5	2014-10-05	05:58:45
713	-125.46	48.1604	127.6	TN313	EM302	4.5	2014-10-05	05:58:43
714	-126.098	48.1755	923.7	ONC2014	EK60	89.8	2014-05-08	05:44:19
715 Barkley- South	-126.099	48.1771	916.7	ONC2014	EK60	89.1	2014-05-08	05:20:57
716	-125.204	48.2246	177.6	MF0903	EK60	17.3	2009-08-21	22:03:00
717	-125.209	48.2255	258.8	FK009A	EK60	25.2	2013-08-24	04:37:33
718	-125.209	48.2255	258.8	FK009A	EK60	25.2	2013-08-28	00:27:15
719	-125.201	48.2264	177.6	MF0903	EK60	17.3	2009-08-21	22:05:07
720	-125.211	48.23	228.4	FK009A	EK60	22.2	2013-08-27	23:00:14
721	-125.217	48.23	225.6	FK009A	EK60	21.9	2013-08-28	05:50:42
722	-125.212	48.23	228.4	FK009A	EK60	22.2	2013-08-28	05:52:09
723	-125.211	48.23	228.4	FK009A	EK60	22.2	2013-08-28	05:52:24
724	-125.494	48.2309	143.7	FK009B	EM710	5	2013-08-24	14:47:55
725	-124.898	48.2376	78	SH1305	EK60	7.6	2013-08-14	09:37:35
726	-126.062	48.2382	794.3	FK009A	EM302	27.8	2013-09-12	14:49:41
727	-125.089	48.2388	117.4	MF0509	EK60	11.4	2005-08-12	21:40:09
728	-125.089	48.2388	117.4	MF0509	EK60	11.4	2005-08-12	21:40:13
729	-125.447	48.2388	128	FK009B	EM710	4.5	2013-08-24	14:32:39
730	-125.101	48.239	117.9	MF0509	EK60	11.5	2005-08-12	21:42:35
731	-125.101	48.239	117.9	MF0509	EK60	11.5	2005-08-12	21:42:35
732	-125.447	48.2391	128	FK009B	EM710	4.5	2013-08-24	14:32:43
733	-125.399	48.2429	114.2	MF0509	EK60	11.1	2005-08-12	22:50:29
734	-125.411	48.2457	117.7	FK009B	EM710	4.1	2013-08-24	14:21:16
735	-125.412	48.2459	117.7	FK009B	EM710	4.1	2013-08-24	14:21:20
736	-125.412	48.246	117.7	FK009B	EM710	4.1	2013-08-24	14:21:26
737	-125.412	48.2461	117.7	FK009B	EM710	4.1	2013-08-24	14:21:28
738	-125.386	48.2499	106.2	FK009B	EM710	3.7	2013-08-24	14:13:25
739	-125.386	48.2501	106.2	FK009B	EM710	3.7	2013-08-24	14:13:28
740	-125.388	48.2503	106.2	FK009B	EM710	3.7	2013-08-24	14:13:53
741	-125.387	48.2504	106.2	FK009B	EM710	3.7	2013-08-24	14:13:51
742	-125.208	48.2504	226.6	FK009A	EK60	22	2013-08-24	04:26:38
743	-125.208	48.2504	226.6	FK009A	EK60	22	2013-08-27	22:34:43
744	-125.385	48.2505	106.2	FK009B	EM710	3.7	2013-08-24	14:13:12
745	-125.386	48.2505	106.2	FK009B	EM710	3.7	2013-08-24	14:13:30
746	-125.386	48.2507	106.2	FK009B	EM710	3.7	2013-08-24	14:13:26
747	-125.386	48.2507	106.2	FK009B	EM710	3.7	2013-08-24	14:13:25
748	-125.385	48.2507	110	FK009B	EM710	3.8	2013-08-24	14:13:07
749	-125.383	48.251	109.4	FK009B	EM710	3.8	2013-08-24	14:12:31
750	-125.395	48.2564	111.1	FK009A	EK60	10.8	2013-08-21	15:20:18
751	-125.393	48.2573	111.1	FK009A	EK60	10.8	2013-08-21	15:19:36
752	-125.391	48.2581	111.1	FK009A	EK60	10.8	2013-08-21	15:19:25
753	-125.39	48.2583	111.1	FK009A	EK60	10.8	2013-08-21	15:18:52
754	-125.388	48.259	109.6	FK009A	EK60	10.7	2013-08-21	15:21:02
755	-125.852	48.2597	438	SH1305	EK60	42.6	2013-08-14	23:20:58
756	-125.851	48.2597	438	SH1305	EK60	42.6	2013-08-14	00:20:54
757	-125.847	48.2597	413.9	SH1305	EK60	40.2	2013-08-14	00:21:46.100000
758	-125.848	48.2597	413.9	SH1305	EK60	40.2	2013-08-14	23:21:36
759	-125.475	48.2606	133.1	SH1305	EK60	12.9	2013-08-15	00:43:26
760	-125.479	48.2606	133.3	SH1305	EK60	13	2013-08-15	00:42:27
761	-125.591	48.2608	139.9	SH1305	EK60	13.6	2013-08-15	00:18:05
762	-124.952	48.2613	198.7	SH1305	EK60	19.3	2013-08-15	13:32:27
763	-125.245	48.262	160.7	SH1305	EK60	15.6	2013-08-15	01:33:46
764	-125.387	48.2622	109.6	SH1305	EK60	10.7	2013-08-15	01:02:40
765	-126.099	48.2635	1050.9	FK009A	EM302	36.7	2013-09-11	11:19:05
766	-125.37	48.2686	102.6	MF0710	EK60	10	2007-07-25	20:09:50
767	-125.376	48.2687	104.1	MF0710	EK60	10.1	2007-07-25	20:11:20
768	-125.238	48.2695	165.5	FK009A	EK60	16.1	2013-08-29	21:26:14
769	-125.239	48.2695	165.5	FK009A	EK60	16.1	2013-08-29	21:25:47
770	-125.246	48.2696	159.6	FK009A	EK60	15.5	2013-08-29	21:23:22
771	-125.251	48.2696	159.6	FK009A	EK60	15.5	2013-08-29	14:27:55
772	-125.238	48.2697	165.5	FK009A	EK60	16.1	2013-08-29	14:31:52
773	-125.25	48.2697	159.6	FK009A	EK60	15.5	2013-08-29	10:39:55
774	-125.578	48.2697	137.7	MF0710	EK60	13.4	2007-07-25	20:57:59
775	-125.25	48.2697	159.6	FK009A	EK60	15.5	2013-08-29	10:40:12
776	-125.25	48.2697	159.6	FK009A	EK60	15.5	2013-08-29	21:22:05
777	-125.584	48.2697	137.2	MF0710	EK60	13.3	2007-07-25	20:59:33
778	-125.576	48.2697	137.7	MF0710	EK60	13.4	2007-07-25	20:57:30
779	-125.576	48.2697	137.7	MF0710	EK60	13.4	2007-07-25	20:57:31
780	-125.239	48.2697	165.5	FK009A	EK60	16.1	2013-08-29	10:44:12
781	-125.238	48.2697	165.5	FK009A	EK60	16.1	2013-08-29	10:44:32
782	-125.237	48.2697	165.5	FK009A	EK60	16.1	2013-08-29	10:44:43
783	-125.583	48.2699	137.2	MF0710	EK60	13.3	2007-08-01	00:51:04
784	-125.371	48.27	102.6	FK009A	EK60	10	2013-08-29	13:40:36
785	-125.371	48.27	102.6	FK009A	EK60	10	2013-08-29	13:40:23
786	-125.237	48.27	165.5	FK009A	EK60	16.1	2013-08-29	18:33:08
787	-126.15	48.27	1407.9	MF0710	EK60	136.8	2007-08-01	02:56:19
788	-125.387	48.27	107.2	FK009A	EK60	10.4	2013-08-29	17:35:31
789	-125.388	48.27	107.2	FK009A	EK60	10.4	2013-08-29	17:35:18
790	-126.15	48.27	1407.9	MF0710	EK60	136.8	2007-08-01	02:56:13
791	-125.239	48.27	165.5	FK009A	EK60	16.1	2013-08-29	18:32:34
792	-125.395	48.27	111.6	FK009A	EK60	10.8	2013-08-29	17:33:26
793	-125.379	48.2701	104.1	FK009A	EK60	10.1	2013-08-29	17:37:49
794	-125.371	48.2701	102.6	FK009A	EK60	10	2013-08-29	17:39:54
795	-125.374	48.2701	103.6	FK009A	EK60	10.1	2013-08-29	17:39:07
796	-125.577	48.2701	137.7	MF0710	EK60	13.4	2007-08-01	00:49:36
797	-125.26	48.2702	161.3	FK009A	EK60	15.7	2013-08-29	18:23:49
798	-125.371	48.2708	102.6	FK009A	EK60	10	2013-08-29	23:08:53
799	-124.886	48.2723	74.5	MF0509	EK60	7.2	2005-08-12	20:47:56
800	-125.247	48.2753	161.7	FK009A	EK60	15.7	2013-08-24	13:23:29
801	-125.013	48.2754	301.1	FK009B	EM710	10.5	2013-08-23	21:16:23
802	-125.246	48.2755	161.7	FK009A	EK60	15.7	2013-08-24	13:23:08
803	-125.244	48.2758	163.7	FK009A	EK60	15.9	2013-08-24	13:22:19
804	-125.243	48.276	163.7	FK009A	EK60	15.9	2013-08-24	13:22:02
805	-126.105	48.2837	1182.3	FK009B	EM710	41.3	2013-08-26	05:45:40
806	-125.352	48.284	95.3	FK009A	EK60	9.3	2013-08-21	15:01:41
807	-126.101	48.2842	1182.3	FK009A	EM302	41.3	2013-09-10	09:42:42
808	-126.155	48.2845	1203.4	FK009A	EM302	42.1	2013-09-11	10:18:14
809	-126.155	48.2847	1203.4	FK009A	EM302	42.1	2013-09-10	13:22:42
810	-125.242	48.2872	176.6	FK009A	EK60	17.2	2013-08-29	11:50:00
811	-126.101	48.2906	1120.1	FK009B	EM710	39.2	2013-08-26	05:43:10
812	-125.243	48.3012	182.1	FK009A	EK60	17.7	2013-08-24	12:11:43
813 Barkley Canyon	-126.066	48.3098	937.5	PGC2008007	EK60	91.1	2008-08-09	20:16:06
814	-126.065	48.3098	944.4	FK009B	EM710	33	2013-08-26	05:29:36
815	-126.065	48.3104	944.4	FK009B	EM710	33	2013-08-26	05:29:36
816	-126.065	48.3106	944.4	PGC2008007	EK60	91.8	2008-08-09	21:31:17
817	-126.065	48.3106	944.4	PGC2008007	EK60	91.8	2008-08-09	18:29:30
818	-126.064	48.3108	944.4	PGC2008007	EK60	91.8	2008-08-09	18:18:35
819	-126.055	48.3108	974.1	PGC2008007	EK60	94.7	2008-08-09	21:21:25
820	-126.065	48.3119	944.4	FK009B	EM710	33	2013-08-26	05:29:19
821	-126.06	48.3122	948.9	PGC2008007	EK60	92.2	2008-08-09	21:26:25
822	-125.72	48.3168	154.2	FK009B	EM710	5.4	2013-08-24	21:44:03
823	-125.713	48.3169	153.1	FK009B	EM710	5.4	2013-08-24	21:42:16
824	-125.72	48.3175	154.2	FK009B	EM710	5.4	2013-08-24	21:44:05
825	-125.714	48.3181	153.1	FK009B	EM710	5.4	2013-08-24	21:42:21
826	-125.714	48.3183	153.1	FK009B	EM710	5.4	2013-08-24	21:42:21
827	-125.712	48.3188	153.1	FK009B	EM710	5.4	2013-08-24	21:41:34
828	-125.709	48.3189	152.9	FK009B	EM710	5.3	2013-08-24	21:40:59
829	-126.073	48.3192	733.8	PGC2013003	EK60	71.3	2013-05-19	21:22:07
830	-125.68	48.3226	143.7	FK009B	EM710	5	2013-08-24	21:31:18
831	-125.679	48.3229	143.2	FK009B	EM710	5	2013-08-24	21:31:55
832	-125.679	48.3238	143.2	FK009B	EM710	5	2013-08-24	21:31:49
833	-125.767	48.3365	154.8	FK009B	EM710	5.4	2013-08-25	15:10:57
834	-125.876	48.3377	358.6	FK009A	EK60	34.9	2013-08-25	20:04:54
835	-125.874	48.3378	358.6	FK009B	EM710	12.5	2013-08-25	20:04:24
836	-125.872	48.338	337.4	FK009B	EM710	11.8	2013-08-25	20:03:53
837	-125.882	48.3396	383.6	FK009B	EM710	13.4	2013-08-25	20:06:52
838	-125.885	48.3401	383.6	FK009B	EM710	13.4	2013-08-25	20:07:55
839	-126.012	48.3419	844.1	ONC2014	EK60	82	2014-05-12	06:18:54
840	-126.014	48.3432	794.2	ONC2014	EK60	77.2	2014-05-12	06:18:10
841	-125.14	48.3443	157.1	TN313	EM302	5.5	2014-10-05	07:24:24
842	-125.136	48.3468	163.7	TN313	EM302	5.7	2014-10-05	07:25:19
843	-125.884	48.347	318.5	SIK2016	EM302	11.1	2016-06-14	00:53:31
844	-125.136	48.3474	163.7	TN313	EM302	5.7	2014-10-05	07:25:30
845	-125.881	48.3477	213.1	SIK2016	EM302	7.5	2016-06-14	00:51:44
846	-125.882	48.3478	222.4	SIK2016	EM302	7.8	2016-06-14	00:51:55
847	-125.879	48.348	213.1	SIK2016	EM302	7.5	2016-06-14	00:51:25
848	-125.136	48.3486	135.7	TN313	EM302	4.7	2014-10-05	07:25:47
849	-125.747	48.3494	147.6	FK009B	EM710	5.2	2013-08-28	19:56:03
850	-125.874	48.3509	208	ONC2014	EK60	20.2	2014-05-12	11:51:44
851	-125.875	48.3511	208	ONC2014	EK60	20.2	2014-05-12	09:23:38
852	-125.876	48.3515	208	ONC2014	EK60	20.2	2014-05-12	09:23:50
853	-125.875	48.3516	208	ONC2014	EK60	20.2	2014-05-12	11:50:19
854	-125.876	48.352	195.5	ONC2014	EK60	19	2014-05-05	06:32:27
855	-125.879	48.3538	206.4	ONC2014	EK60	20.1	2014-05-12	11:49:48
856	-125.879	48.3541	206.4	ONC2014	EK60	20.1	2014-05-05	06:30:49
857	-125.88	48.3541	206.4	ONC2014	EK60	20.1	2014-05-12	09:21:55
858	-125.341	48.3618	119.1	FK009B	EM710	4.2	2013-08-27	20:02:17
859	-125.446	48.3637	130.6	FK009B	EM710	4.6	2013-08-23	18:11:01
860	-125.455	48.3662	131.1	FK009B	EM710	4.6	2013-08-23	18:08:55
861	-125.48	48.3734	131	FK009B	EM710	4.6	2013-08-23	18:03:12
862	-126.222	48.3792	943.2	MF0903	EK60	91.7	2009-08-22	17:14:38
863	-126.223	48.3792	943.2	MF0903	EK60	91.7	2009-08-22	17:14:36
864	-126.209	48.3808	945.4	FK009B	EM710	33.1	2013-08-25	08:05:47
865	-125.735	48.3854	140.6	FK009A	EK60	13.7	2013-08-24	22:26:53
866	-125.734	48.3856	140.6	FK009A	EK60	13.7	2013-08-24	22:27:10
867	-125.733	48.3856	140.6	FK009B	EM710	4.9	2013-08-24	21:44:03
868	-125.733	48.3858	140.6	FK009A	EK60	13.7	2013-08-24	22:27:28
869	-125.731	48.3862	141.1	FK009A	EK60	13.7	2013-08-24	22:28:02
870	-125.73	48.3864	141.1	FK009A	EK60	13.7	2013-08-24	22:28:27
871	-125.729	48.3865	141.1	FK009A	EK60	13.7	2013-08-24	22:28:34
872	-125.914	48.3877	343.5	FK009A	EK60	33.4	2013-08-20	01:27:14
873	-125.982	48.3884	300.8	ONC2014	EK60	29.2	2014-05-05	08:18:54
874	-125.982	48.3892	300.8	ONC2014	EK60	29.2	2014-05-05	08:18:31
875	-125.732	48.3899	138.5	SIK2016	EM302	4.8	2016-06-14	00:17:14
876	-125.733	48.39	138.5	SIK2016	EM302	4.8	2016-06-14	00:17:18
877	-125.911	48.39	276.4	FK009A	EK60	26.9	2013-08-20	01:25:33
878	-125.731	48.3902	138.8	SIK2016	EM302	4.9	2016-06-14	00:16:54
879	-125.981	48.3903	300.8	ONC2014	EK60	29.2	2014-05-05	08:18:07
880	-125.733	48.3903	138.5	SIK2016	EM302	4.8	2016-06-14	00:17:18
881	-125.731	48.3905	138.8	SIK2016	EM302	4.9	2016-06-14	00:16:54
882	-125.914	48.3909	343.5	FK009A	EK60	33.4	2013-08-25	01:38:06
883	-125.916	48.3911	343.5	SH1103	EK60	33.4	2011-08-12	19:50:51
884	-125.98	48.3913	300.8	ONC2014	EK60	29.2	2014-05-05	08:17:42
885	-125.727	48.3917	137.1	SIK2016	EM302	4.8	2016-06-14	00:15:58
886	-125.984	48.3931	267.9	ONC2014	EK60	26	2014-05-08	17:21:50
887	-125.925	48.3987	497.9	SH1103	EK60	48.4	2011-08-12	19:47:34
888	-125.926	48.3999	515.5	SH1103	EK60	50.1	2011-08-12	19:47:04
889	-124.923	48.4055	215.3	MF0509	EK60	20.9	2005-08-12	19:04:02
890	-126.039	48.4067	192.7	ONC2014	EK60	18.7	2014-05-12	07:58:56
891	-126.04	48.4072	192.7	ONC2014	EK60	18.7	2014-05-12	07:59:14
892	-126.043	48.4099	189.6	ONC2014	EK60	18.4	2014-05-12	08:00:45
893	-124.934	48.41	226	MF0903	EK60	22	2009-08-23	02:19:35
894	-124.932	48.41	225.9	MF0903	EK60	22	2009-08-23	02:21:01
895	-126.044	48.4106	190.6	ONC2014	EK60	18.5	2014-05-12	08:01:13
896	-124.766	48.4138	201.9	SH1305	EK60	19.6	2013-08-15	15:11:50
897	-125.897	48.4145	161.9	FK009B	EM710	5.7	2013-08-25	02:55:51
898	-124.766	48.4146	201.9	SH1305	EK60	19.6	2013-08-15	15:12:10
899	-126.41	48.4263	1085.5	MF0710	EK60	105.5	2007-08-01	12:37:18
900	-124.973	48.427	258.9	SH1305	EK60	25.2	2013-08-15	18:41:18
901	-126.41	48.4276	1073.3	SH1305	EK60	104.3	2013-08-16	03:41:54
902	-125.153	48.4292	163.6	SH1305	EK60	15.9	2013-08-28	20:29:55
903	-126.218	48.4368	585.1	MF0710	EK60	56.9	2007-08-01	16:51:52
904	-125.449	48.4368	157.9	MF0710	EK60	15.3	2007-08-01	19:23:56
905	-126.217	48.4371	585.1	MF0710	EK60	56.9	2007-08-01	14:11:32
906	-126.219	48.4371	585.1	MF0710	EK60	56.9	2007-08-01	14:11:11
907	-125.451	48.4389	156.9	MF0710	EK60	15.2	2007-08-01	23:01:18
908	-125.416	48.4392	157	FK009A	EK60	15.3	2013-08-27	11:57:51
909	-125.416	48.4394	157	FK009A	EK60	15.3	2013-08-27	11:58:01
910	-125.754	48.4403	128	FK009A	EK60	12.4	2013-08-25	02:11:08
911	-125.925	48.4467	157.3	PGC2013003	EK60	15.3	2013-05-21	21:13:18
912	-126.163	48.4536	414.4	FK009A	EK60	40.3	2013-08-21	00:12:38
913	-125.79	48.4579	113	FK009A	EK60	11	2013-08-23	16:52:40
914	-125.792	48.4584	113	FK009A	EK60	11	2013-08-23	16:52:15
915	-125.793	48.4588	113	FK009A	EK60	11	2013-08-23	16:51:54
916	-125.794	48.459	113.1	FK009A	EK60	11	2013-08-23	16:51:46
917	-125.943	48.463	146.5	FK009A	EK60	14.2	2013-08-25	16:34:42
918	-125.347	48.4636	160.1	FK009B	EM710	5.6	2013-08-28	11:59:11
919	-124.752	48.4764	267.3	SH1103	EK60	26	2011-08-25	13:00:44
920	-125.952	48.4772	135.3	FK009A	EK60	13.1	2013-08-25	03:45:57
921	-125.951	48.4783	134.8	FK009A	EK60	13.1	2013-08-25	03:46:37
922	-125.95	48.4789	134.8	FK009A	EK60	13.1	2013-08-25	03:46:58
923	-125.949	48.4798	132.3	FK009A	EK60	12.9	2013-08-25	03:47:32
924	-125.948	48.4801	132.3	FK009A	EK60	12.9	2013-08-25	03:47:42
925	-125.901	48.4828	125	ONC2014	EK60	12.1	2014-05-06	09:05:45
926	-125.9	48.4834	125	ONC2014	EK60	12.1	2014-05-06	09:06:03
927	-125.899	48.4837	123.3	ONC2014	EK60	12	2014-05-06	09:06:15
928	-125.896	48.4856	123.4	ONC2014	EK60	12	2014-05-06	09:07:26
929	-125.799	48.4857	103	PGC2013003	EK60	10	2013-05-21	22:25:31
930	-125.799	48.4857	103	PGC2013003	EK60	10	2013-05-21	22:25:51
931	-126.103	48.4913	193	FK009A	EK60	18.8	2013-08-23	04:50:06
932	-126.101	48.4924	200.3	FK009A	EK60	19.5	2013-08-23	04:48:39
933	-126.107	48.4934	197.7	FK009A	EK60	19.2	2013-08-23	05:40:43
934	-126.106	48.494	197.7	FK009A	EK60	19.2	2013-08-23	05:41:14
935	-125.854	48.4941	108.9	FK009B	EM710	3.8	2013-08-25	13:38:39
936	-126.104	48.4945	199.9	FK009A	EK60	19.4	2013-08-23	05:41:42
937	-126.099	48.4946	200.3	FK009A	EK60	19.5	2013-08-23	04:45:40
938	-126.103	48.4948	199.9	FK009A	EK60	19.4	2013-08-23	05:41:56
939	-126.098	48.4956	200.3	FK009A	EK60	19.5	2013-08-23	04:44:08
940	-126.101	48.4958	200.3	FK009A	EK60	19.5	2013-08-23	05:42:43
941	-126.098	48.4961	200.3	FK009A	EK60	19.5	2013-08-23	04:43:26
942	-126.097	48.4967	200.3	FK009A	EK60	19.5	2013-08-23	04:42:49
943	-126.448	48.4972	1252	FK009A	EM302	43.8	2013-09-10	07:21:18
944	-125.873	48.4974	107.7	ONC2014	EK60	10.5	2014-05-06	09:14:22
945	-126.095	48.498	194.1	FK009A	EK60	18.9	2013-08-23	05:44:30
946	-125.871	48.4986	107.3	ONC2014	EK60	10.4	2014-05-06	09:14:59
947	-125.869	48.4996	107.2	ONC2014	EK60	10.4	2014-05-06	09:16:03
948	-126.092	48.4996	189.5	FK009B	EM710	6.6	2013-08-23	04:27:29
949	-125.845	48.4996	105	PGC2013003	EK60	10.2	2013-05-21	22:13:28
950	-125.845	48.4997	105	PGC2013003	EK60	10.2	2013-05-21	22:13:19
951	-126.09	48.5	189.5	FK009A	EK60	18.4	2013-08-23	05:46:07
952	-125.941	48.5002	123.4	FK009A	EK60	12	2013-08-23	16:19:47
953	-125.867	48.5003	107.4	ONC2014	EK60	10.4	2014-05-06	09:15:33
954	-125.943	48.5008	125.1	FK009A	EK60	12.2	2013-08-23	16:19:19
955	-125.944	48.501	125.1	FK009A	EK60	12.2	2013-08-23	16:19:11
956	-124.774	48.5091	231.6	SH1305	EK60	22.5	2013-08-14	07:46:30
957	-125.988	48.5128	139.1	FK009A	EK60	13.5	2013-08-23	16:08:04
958	-126.058	48.5146	167	FK009A	EK60	16.2	2013-08-25	17:17:25
959	-126.058	48.5162	167	FK009A	EK60	16.2	2013-08-23	05:58:00
960	-126.056	48.517	162	FK009A	EK60	15.7	2013-08-23	05:58:34
961	-126.056	48.5174	162	FK009A	EK60	15.7	2013-08-23	05:58:51
962	-125.056	48.5184	132.8	SIK2016	EM302	4.6	2016-06-13	21:44:43
963	-126.057	48.5192	160.6	FK009B	EM710	5.6	2013-08-23	04:27:24
964	-126.056	48.5192	157.9	FK009B	EM710	5.5	2013-08-23	04:27:07
965	-126.057	48.5192	157.9	FK009B	EM710	5.5	2013-08-23	04:27:15
966	-126.056	48.5193	157.9	FK009B	EM710	5.5	2013-08-23	04:27:07
967	-126.056	48.5194	157.9	FK009B	EM710	5.5	2013-08-23	04:27:07
968	-126.058	48.5194	160.6	FK009B	EM710	5.6	2013-08-23	04:27:29
969	-126.056	48.5198	157.9	FK009B	EM710	5.5	2013-08-23	04:26:53
970	-125.241	48.5199	132.7	FK009B	EM710	4.6	2013-08-23	23:43:42
971	-126.055	48.52	157.9	FK009B	EM710	5.5	2013-08-23	04:26:42
972	-126.055	48.52	157.9	FK009B	EM710	5.5	2013-08-23	04:26:33
973	-125.242	48.5202	132.7	FK009B	EM710	4.6	2013-08-23	23:43:57
974	-126.057	48.5202	157.9	FK009B	EM710	5.5	2013-08-23	04:27:01
975	-126.057	48.5203	157.9	FK009B	EM710	5.5	2013-08-23	04:27:01
976	-125.241	48.5204	132.7	FK009B	EM710	4.6	2013-08-23	23:43:52
977	-126.055	48.5205	157.9	FK009B	EM710	5.5	2013-08-23	04:26:39
978	-125.241	48.5207	132.7	FK009B	EM710	4.6	2013-08-23	23:43:58
979	-126.055	48.5208	157.9	FK009B	EM710	5.5	2013-08-23	04:26:33
980	-124.961	48.5276	65.2	FK009A	EK60	6.3	2013-08-19	19:04:08
981	-124.977	48.529	50.9	FK009A	EK60	4.9	2013-08-19	19:07:38
982	-125.007	48.5304	65.5	FK009A	EK60	6.4	2013-08-19	19:14:13
983	-125.355	48.5336	140.5	FK009A	EK60	13.7	2013-08-22	08:35:38
984	-125.357	48.5338	140.5	FK009B	EM710	4.9	2013-08-22	08:35:15
985	-125.937	48.5427	99.8	FK009A	EK60	9.7	2013-08-21	05:15:08
986	-125.93	48.5562	94.7	FK009A	EK60	9.2	2013-08-21	05:08:56
987	-125.323	48.5596	110.4	FK009B	EM710	3.9	2013-08-23	00:13:53
988	-125.322	48.5602	110.4	FK009B	EM710	3.9	2013-08-23	00:13:45
989	-125.325	48.5615	111.4	FK009B	EM710	3.9	2013-08-23	00:14:51
990	-125.325	48.5617	111.4	FK009B	EM710	3.9	2013-08-23	00:14:53
991	-125.325	48.5619	111.4	FK009B	EM710	3.9	2013-08-23	00:14:57
992	-125.324	48.5665	110.3	FK009B	EM710	3.9	2013-08-23	14:42:43
993	-125.324	48.5686	108.9	FK009B	EM710	3.8	2013-08-23	14:41:52
994	-125.324	48.5687	108.9	FK009B	EM710	3.8	2013-08-23	14:41:49
995	-125.325	48.5688	108.9	FK009B	EM710	3.8	2013-08-23	14:41:49
996	-125.17	48.5721	103.1	MF0509	EK60	10	2005-08-12	01:28:41
997	-125.113	48.5826	100.3	FK009B	EM710	3.5	2013-08-23	13:22:45
998	-125.439	48.5918	139	FK009B	EM710	4.9	2013-08-22	09:13:35
999	-126.048	48.5939	117.7	SH1305	EK60	11.4	2013-08-16	21:21:27
1000	-125.492	48.5946	126.4	FK009B	EM710	4.4	2013-08-22	09:29:33
1001	-125.492	48.5947	126.4	FK009B	EM710	4.4	2013-08-22	09:35:36
1002	-125.462	48.603	140.6	MF0710	EK60	13.7	2007-08-02	15:12:32
1003	-125.395	48.6031	130.7	MF0710	EK60	12.7	2007-08-02	14:58:52
1004	-125.58	48.6102	129.1	FK009B	EM710	4.5	2013-08-22	09:56:35
1005	-125.285	48.6239	114.8	FK009B	EM710	4	2013-08-22	14:14:08
1006	-126.129	48.6308	153.4	SH1204	EK60	14.9	2012-08-11	18:34:25
1007	-125.278	48.6321	109.6	FK009B	EM710	3.8	2013-08-22	14:09:53
1008	-126.917	48.633	1457.1	1	n.a.
1009	-126.754	48.6469	1424.1	FK009A	EM302	49.8	2013-09-10	05:37:54
1010	-126.469	48.6578	858.5	SIK2016	EM710	30	2016-07-02	20:56:31
1011 Amnesiac	-126.917	48.6598	1298.1	PGC2008007	EK60	126.2	2008-08-08	15:46:52
1012	-126.917	48.6629	1298.1	PGC2008007	EK60	126.2	2008-08-03	03:33:49
1013	-126.902	48.6638	1254.4	PGC2008007	EK60	121.9	2008-08-05	04:18:43
1014	-126.899	48.6648	1254.8	ONC2015	EM302	43.9	2015-09-12	10:29:31
1015	-126.851	48.668	1278.1	8	ROV, EK60	12.8
1016 Clayoquot	-126.845	48.6692	1266.9	PGC2008007	EK60	123.1	2008-08-05	14:44:59
1017 Amnesiac-East	-126.842	48.6735	1260.8	PGC2008007	EK60	122.5	2008-08-03	03:57:38
1018	-125.526	48.6756	169.6	FK009B	EM710	5.9	2013-08-26	15:09:16
1019	-126.657	48.6769	1301.3	Naut2016	EM302	45.5	2016-05-17	11:10:07
1020	-126.664	48.677	1307.2	Naut2016	EM302	45.7	2016-05-17	11:08:42
1021	-126.665	48.6777	1307.2	Naut2016	EM302	45.7	2016-05-17	11:08:31
1022	-126.664	48.6784	1307.2	Naut2016	EM302	45.7	2016-05-17	11:08:31
1023	-126.588	48.6799	1224.2	Naut2016	EM302	42.8	2016-05-17	11:24:20
1024	-126.586	48.6808	1224.2	PGC2014006	EK60	119	2014-09-30	06:22:29
1025	-126.866	48.682	1265.6	8	ROV, EK60	12.7	n.a.
1026	-126.859	48.6914	1243.9	4	AUV/ROV	12.4	n.a.
1027	-126.918	48.7049	1311.5	8	ROV, EK60	13.1	n.a.
1028	-126.909	48.7068	1333.7	4	AUV/ROV	13.3	n.a.
1029	-126.901	48.7131	1325.1	PGC2008007	EK60	128.8	2008-08-07	22:50:48
1030	-125.735	48.7132	125	FK009B	EM710	4.4	2013-08-23	02:21:28
1031 Spinnaker	-126.902	48.714	1325.1	PGC2008007	EK60	128.8	2008-08-07	11:06:01
1032	-126.902	48.7141	1325.1	9	ROV, EK60	13.3	n.a.
1033	-126.723	48.7168	1312.4	ONC2015	EM302	45.9	2015-09-12	20:24:45
1034	-126.721	48.7173	1312.4	ONC2015	EM302	45.9	2015-09-12	20:24:45
1035	-126.719	48.7182	1311.8	ONC2015	EM302	45.9	2015-09-12	20:24:46
1036	-126.904	48.7183	1328.2	1	n.a.
1037 Spinnaker-North	-126.919	48.723	1347.8	PGC2008007	EK60	131	2008-08-06	04:08:10
1038	-126.645	48.7293	1146.1	ONC2015	EM302	40.1	2015-09-13	02:42:50
1039	-126.657	48.7295	1186.3	ONC2015	EM302	41.5	2015-09-13	01:18:20
1040	-126.656	48.7425	1137.7	ONC2015	EM302	39.8	2015-09-13	02:36:00
1041	-126.497	48.7623	402.2	MF0710	EK60	39.1	2007-08-03	03:10:01
1042	-126.528	48.7985	288.2	SH1204	EK60	28	2012-08-17	19:41:51
1043	-126.28	48.8156	159.9	SH1305	EK60	15.5	2013-08-18	10:29:23
1044	-126.466	48.9049	169.9	SH1305	EK60	16.5	2013-08-18	11:15:53
1045	-126.467	48.9054	169.9	SH1305	EK60	16.5	2013-08-18	11:16:08
1046	-126.471	48.9055	169.3	MF0509	EK60	16.5	2005-08-10	17:53:35
1047	-126.467	48.9055	175.1	MF0509	EK60	17	2005-08-10	17:54:25
1048	-126.466	48.9055	175.1	MF0509	EK60	17	2005-08-10	17:54:32
1049	-126.46	48.9056	184.6	MF0509	EK60	17.9	2005-08-10	17:55:48
1050	-126.471	48.908	172.4	SH1305	EK60	16.8	2013-08-18	11:17:40
1051	-126.181	48.9451	103.3	SH1305	EK60	10	2013-08-28	15:08:17
1052	-126.717	48.9983	240.8	PGC2001003	EK60	23.4	n.a.
1053	-126.858	49.0929	235.9	SH1305	EK60	22.9	2013-08-18	23:00:57
1054	-126.852	49.093	220.9	SH1305	EK60	21.5	2013-08-18	22:59:38
1055	-126.736	49.1034	150.2	MF0710	EK60	14.6	2007-08-04	20:47:04
1056	-126.739	49.1035	149.9	MF0710	EK60	14.6	2007-08-04	20:46:34
1057	-126.875	49.1035	239.8	MF0710	EK60	23.3	2007-08-04	20:17:24
1058	-127.447	49.2481	1528.9	PGC2014006	EK60	148.6	2014-09-29	21:35:51
1059	-126.912	49.2664	156.2	MF0710	EK60	15.2	2007-08-05	12:45:49
1060	-126.913	49.2664	156.2	MF0710	EK60	15.2	2007-08-05	12:45:35
1061	-126.914	49.2669	156.2	SH1305	EK60	15.2	2013-08-20	08:00:37
1062	-126.913	49.267	156.2	SH1305	EK60	15.2	2013-08-20	08:00:25
1063	-127.102	49.2702	371.2	MF0710	EK60	36.1	2007-08-05	13:54:06
1064	-127.11	49.2702	352.3	MF0710	EK60	34.2	2007-08-05	13:55:56
1065	-127.108	49.2702	352.3	MF0710	EK60	34.2	2007-08-05	13:55:14
1066	-127.123	49.2702	355.5	MF0710	EK60	34.6	2007-08-05	13:58:16
1067	-127.637	49.2764	1837.5	MBARI2002	ROV Tiburon	18.4	2002-08-26	n.a.
1068	-127.652	49.278	2283.3	MBARI2002	ROV Tiburon	22.8	2002-08-26	n.a.
1069	-127.68	49.2962	2297	TN172	ROV ROPOS	23	2004-09-04	n.a.
1070	-127.091	49.2979	297	SH1204	EK60	28.9	2012-08-24	02:36:09
1071	-127.694	49.3106	2341.9	TN172	ROV ROPOS	23.4	2004-09-04	n.a.
1072	-127.697	49.3111	2372.1	TN172	ROV ROPOS	23.7	2004-09-04	n.a.
1073	-127.66	49.318	2458.8	MBARI2002	ROV Tiburon	24.6	2002-08-26	n.a.
1074	-127.15	49.3333	225.2	PGC2001003	EK60	21.9	n.a.
1075	-127.72	49.3519	1820.3	MBARI2002	ROV Tiburon	18.2	2002-08-26	n.a.
1076	-126.975	49.4511	128.2	SH1103	EK60	12.5	2011-08-25	04:22:36
1077	-127.061	49.4878	136	SH1103	EK60	13.2	2011-08-25	04:04:25
1078	-127.063	49.4885	136	SH1103	EK60	13.2	2011-08-25	04:05:31
1079	-127.065	49.4892	137.4	SH1103	EK60	13.4	2011-08-25	04:03:41
1080	-127.067	49.4902	137.1	SH1103	EK60	13.3	2011-08-25	04:03:07
1081	-127.07	49.4913	138.2	SH1103	EK60	13.4	2011-08-25	04:02:45
1082	-127.072	49.4925	139.7	SH1103	EK60	13.6	2011-08-25	04:02:01
1083	-127.077	49.4942	141.2	SH1103	EK60	13.7	2011-08-25	04:01:09
1084	-127.08	49.4955	140.5	SH1103	EK60	13.7	2011-08-25	04:00:29
1085	-127.217	49.5017	260.9	PGC2001003	EK60	25.4	n.a.
1086	-127.627	49.5574	780.2	PGC2013008	EK60	75.8	2013-12-05	02:42:01
1087	-127.619	49.5594	771.8	PGC2013008	EK60	75	2013-12-05	02:44:21
1088	-127.615	49.5604	744.6	PGC2013008	EK60	72.4	2013-12-05	02:45:26
1089	-127.356	49.598	547.9	SH1103	EK60	53.3	2011-08-26	18:08:08
1090	-127.437	49.6672	524.5	SH1103	EK60	51	2011-08-26	18:36:40
1091	-127.451	49.6747	517	SH1103	EK60	50.2	2011-08-26	18:40:22
1092	-127.586	49.7507	350.6	SH1103	EK60	34.1	2011-08-26	19:14:54
1093	-127.951	49.8372	907.1	SH1103	EK60	88.2	2011-08-23	17:41:19
1094	-128.034	49.9374	872.9	MF0710	EK60	84.8	2007-08-06	20:58:50
1095	-128.039	49.9374	882.8	MF0710	EK60	85.8	2007-08-06	20:59:50
1096	-128.092	49.9778	746.8	SH1103	EK60	72.6	2011-08-23	19:01:37
1097	-128.09	49.9787	789.5	SH1103	EK60	76.7	2011-08-23	19:02:09
1098	-128.165	50.0026	926.8	SH1305	EK60	90.1	2013-08-22	05:35:40
1099	-128.351	50.0272	1110.2	SH1103	EK60	107.9	2011-08-24	02:38:11
1100	-127.975	50.0357	784.1	SH1103	EK60	76.2	2011-08-24	05:30:55
1101	-127.928	50.0818	77.8	SH1305	EK60	7.6	2013-08-22	02:07:39
1102	-127.927	50.0824	77.8	SH1305	EK60	7.6	2013-08-22	02:08:10
1103	-127.921	50.0862	59	SH1305	EK60	5.7	2013-08-22	02:11:05
1104	-127.921	50.0864	59	SH1305	EK60	5.7	2013-08-22	02:11:15
1105	-127.928	50.0865	60.8	SH1507	EK60	5.9	2015-08-28	22:58:17
1106	-127.92	50.0866	59	SH1305	EK60	5.7	2013-08-22	02:11:22
1107	-127.929	50.0869	60.8	SH1507	EK60	5.9	2015-08-28	22:58:09
1108	-128.354	50.1036	1439.7	MF0710	EK60	139.9	2007-08-06	23:30:35
1109	-128.753	50.5432	925.7	SH1103	EK60	90	2011-08-30	13:15:01
1110	-129.773	50.9668	836.8	MF0710	EK60	81.3	2007-08-07	20:36:59
1111	-129.775	50.9683	867.4	MF0710	EK60	84.3	2007-08-07	20:37:44
Supplementary References
1	Johnson, H. P. et al. Analysis of bubble plume distributions to evaluate methane hydrate decomposition on the continental slope, Geochemistry Geophysics Geosystems (DOI: 10.1002/2015GC005955 (2015).
2	Collier, R. W., Lilley, M. D. Composition of methane seeps on the Cascadia continental margin, Geophys. Res. Lett., 32, LO6609, doi:10.1029/2004GL022050 (2005).
3	Torres, M. E., et al. Methane sources feeding cold seeps on the shelf and upper continental slope off central Oregon, USA, Geochem. Geophys. Geosyst., 10, Q11003, doi:10.1029/2009GC002518 (2009).
4	Paull, C. K. et al. Seafloor geomorphic manifestations of gas venting and shallow sub bottom gas hydrate occurrences, Geosphere, doi: 10.1130/GES01012.1 (2015).
5	Carson, B., Holmes, M. L., Umstattd, K., Strasser, L. C. & Johnson, H. P. Fluid expulsion from the Cascadia accretionary prism: Evidence from porosity distribution, direct measurements, and GLORIA Imagery, Philos. Trans. R. Soc. London A, 335, 331–340 (1991).
6	Carson, B., Suess, E. & Strasser, J. C. Fluid flow and mass flux determinations at vent sites on the Cascadia margin accretionary prism, J. of Geophysical Research, 95. 8891-8897 (1990).
7	Johnson, H. P., Solomon, E. A., Harris, R. N., Salmi, M. S. & Berg, R. D. Heat flow and fluid flux in Cascadia’s seismogenic zone, Eos Trans. AGU, 94(48), 457–458 (2013).
8	Riedel, M., Hyndman, R. D., Spence, G. D. & Chapman, N. R. Seismic Investigations of a Vent Field Associated with Gas Hydrates, Offshore Vancouver Island, Journal of Geophysical Research, Solid Earth, Vol 107, No. B9, 2200, doi:10.1029/2001 (2002).
9	Riedel, M., Tréhu, A. M. & Spence G. D. Characterizing the thermal regime of cold vents at the northern Cascadia margin from bottom-simulating reflector distributions, heat-probe measurements and borehole temperature data, Marine Geophysical Researches, doi: 10.1007/s11001-010-9080-2 (2010).
